# Supplementary material
Source: publisher figshare collection journal article supplement (https://gsajournals.figshare.com/ndownloader/files/16874849)
Supplement: Supplementary file 1 [file 16874849]

## Sheet: delrmtA_virulence_UP
AFLA_ID	Expression	Description
AFLA_000370	1.15738	hypothetical protein
AFLA_000620	-1.463	hypothetical protein
AFLA_001410	1.35037	pectin methylesterase, putative
AFLA_001680	-1.67838	hypothetical protein
AFLA_001820	-1.11849	hypothetical protein
AFLA_002150	1.25287	dimethylaniline monooxygenase, putative
AFLA_002520	-1.16657	hypothetical protein
AFLA_002690	1.17315	lectin family integral membrane protein, putative
AFLA_003350	-2.24323	hypothetical protein
AFLA_003920	1.74734	cysteine synthase (o-acetylserine (thiol)-lyase) (csase)
AFLA_004060	1.60396	hypothetical protein
AFLA_004280	-1.11849	C6 transcription factor, putative
AFLA_004380	1.02866	xylosidase : arabinofuranosidase, putative
AFLA_004390	-3.10648	hypothetical protein
AFLA_004510	1.73806	peroxidase, putative
AFLA_004540	-1.9738	hydrolase, carbon-nitrogen family, putative
AFLA_004660	-1.21422	glycogen synthase Gsy1, putative
AFLA_006530	-2.89574	hypothetical protein
AFLA_006930	4.58653	MIND kinetochore complex component Nnf1, putative
AFLA_007030	1.83823	RNA binding protein Nrd1, putative
AFLA_008350	1.7108	amine oxidase
AFLA_009150	-2.50711	hypothetical protein
AFLA_009460	-1.28422	hypothetical protein
AFLA_010180	1.18763	hypothetical protein
AFLA_010610	1.98697	enoyl-CoA hydratase/isomerase family protein
AFLA_010700	-1.77301	hypothetical protein
AFLA_011000	-1.74089	hypothetical protein
AFLA_011330	-1.74089	MFS transporter, putative
AFLA_011480	-1.17006	amino acid permease (Can1), putative
AFLA_011630	-1.10596	transcriptional regulatory protein DEP1, putative
AFLA_011650	1.36221	hypothetical protein
AFLA_012000	1.82059	hypothetical protein
AFLA_012010	1.21457	C6 transcription factor (Ctf1B), putative
AFLA_012870	1.54315	conserved hypothetical protein
AFLA_013040	2.00265	conserved hypothetical protein
AFLA_013470	-1.59332	flavin-containing amine oxidasedehydrogenase, putative
AFLA_013480	1.6026	conserved hypothetical protein
AFLA_014200	1.81593	sugar transporter, putative
AFLA_014520	1.91341	multicopper oxidase, putative
AFLA_014560	-1.6331	hypothetical protein
AFLA_014730	-1.13225	urease accessory protein UreD
AFLA_014780	1.3396	WD repeat protein
AFLA_015280	1.31812	hypothetical protein
AFLA_015710	1.69513	conserved hypothetical protein
AFLA_016170	1.32358	AMP dependent CoA ligase, putative
AFLA_016180	-2.08639	hypothetical protein
AFLA_016840	-1.62948	Mechanosensitive ion channel family
AFLA_017210	1.25016	C2H2 finger domain protein, putative
AFLA_017450	-1.9738	hypothetical protein
AFLA_017860	2.98718	hypothetical protein
AFLA_018080	-1.89361	DUF6 domain protein, putative
AFLA_018670	1.82722	cell wall biogenesis protein Mhp1, putative
AFLA_019440	-1.11855	conserved hypothetical protein
AFLA_019600	1.04831	hypothetical protein
AFLA_019740	1.51247	multidrug resistance protein 1, 2, putative
AFLA_019810	1.05998	protein pal1, putative
AFLA_019990	-1.00633	conserved hypothetical protein
AFLA_020290	-4.79244	PH domain protein
AFLA_020400	1.13374	conserved hypothetical protein
AFLA_020590	-2.17428	aldose 1-epimerase, putative
AFLA_020630	1.57191	1,3-beta-glucanosyltransferase, putative
AFLA_020660	-2.35027	conserved hypothetical protein
AFLA_020830	1.96868	GTPase activating protein (Gyp3), putative
AFLA_020860	1.35037	RTA1 domain protein, putative
AFLA_020870	2.47829	kinesin family protein
AFLA_020940	-1.74089	conserved hypothetical protein
AFLA_021260	1.49916	GPI anchored protein, putative
AFLA_021320	-2.24323	NAD dependent epimerase/dehydratase, putative
AFLA_021890	1.17669	hypothetical protein
AFLA_022250	-1.79636	SPX domain protein
AFLA_022270	2.34319	conserved hypothetical protein
AFLA_023020	-2.50711	NRPS-like enzyme, putative
AFLA_023030	1.72038	cytochrome P450 oxidoreductase GliC-like, putative
AFLA_023100	-2.8212	hypothetical protein
AFLA_023260	2.79058	pathway-specific regulatory protein
AFLA_023490	-1.71106	alpha-amylase, putative
AFLA_023500	-1.30442	extracellular conserved serine-rich protein
AFLA_023980	1.01637	MFS transporter, putative
AFLA_024210	1.01637	cytochrome P450, putative
AFLA_024830	1.06631	conserved hypothetical protein
AFLA_025150	-1.03982	conserved hypothetical protein
AFLA_025700	-1.03696	conserved hypothetical protein
AFLA_026190	1.6671	signal recognition particle protein, putative
AFLA_026310	-2.00261	conserved hypothetical protein
AFLA_026570	-2.31677	conserved hypothetical protein
AFLA_026600	-2.59902	conserved hypothetical protein
AFLA_026970	1.12418	conserved hypothetical protein
AFLA_027220	1.099	hypothetical protein
AFLA_027260	1.15738	conserved hypothetical protein
AFLA_027560	-1.60993	vacuolar protein sorting-associated protein vps13
AFLA_027600	2.26972	O-methyltransferase, putative
AFLA_027610	-1.05708	hypothetical protein
AFLA_027690	1.23977	Leucine Rich Repeat domain protein
AFLA_028270	-1.20546	esterase family protein
AFLA_028320	2.80524	vanillin dehydrogenase, putative
AFLA_028330	-1.24882	hypothetical protein
AFLA_028770	2.60131	conserved hypothetical protein
AFLA_029000	2.4142	conserved hypothetical protein
AFLA_029290	2.38106	conserved hypothetical protein
AFLA_029730	-1.16722	calmodulin-binding protein Sha1, putative
AFLA_029800	-1.31184	phospholipase D precursor, putative
AFLA_029820	1.4785	SAM domain protein
AFLA_030440	-1.60993	dynactin Arp1 p25 subunit
AFLA_030590	1.39974	conserved hypothetical protein
AFLA_030840	2.40791	RTA1 domain protein, putative
AFLA_031080	1.90857	FHA domain protein SNIP1, putative
AFLA_031220	2.92096	RNA Polymerase II CTD phosphatase Fcp1, putative
AFLA_031340	1.78024	bZIP transcription factor (AtfA), putative
AFLA_031740	-2.31677	conserved hypothetical protein
AFLA_031830	-1.18493	ferric-chelate reductase, putative
AFLA_031910	1.13374	acetate kinase, putative
AFLA_032110	2.26478	conserved hypothetical protein
AFLA_032330	1.48011	conserved hypothetical protein
AFLA_032670	2.07659	conserved hypothetical protein
AFLA_032710	2.24837	conserved hypothetical protein
AFLA_032890	1.28641	conserved hypothetical protein
AFLA_033730	2.81078	autophagy regulatory protein Atg2, putative
AFLA_034180	1.09009	uroporphyrinogen-III synthase (UroS), putative
AFLA_034510	-2.05045	mitochondrial carrier protein, putative
AFLA_034540	-1.92119	stress response transcription factor SrrA/Skn7, putative
AFLA_034570	-1.56564	hypothetical protein
AFLA_034940	2.63718	conserved hypothetical protein
AFLA_036020	-1.9738	cytochrome P450 monooxygenase, putative
AFLA_036140	-1.13154	conserved hypothetical protein
AFLA_036550	-1.28931	hypothetical protein
AFLA_036600	1.00675	DUF500 and SH3 domain protein
AFLA_036640	-1.41421	PH domain protein
AFLA_036980	1.05535	MOSC domain protein
AFLA_037000	1.43835	cell cycle control protein tyrosine phosphatase Mih1, putative
AFLA_037740	1.21873	SNF2 family helicase/ATPase, putative
AFLA_038300	-1.00633	sugar transporter, putative
AFLA_038350	1.20888	hypothetical protein
AFLA_038450	1.49277	hypothetical protein
AFLA_040320	1.42152	P38 MAPK, putative
AFLA_040740	-1.13286	flavin containing amine oxidase, putative
AFLA_040750	2.09381	hypothetical protein
AFLA_041330	2.81876	C6 transcription factor, putative
AFLA_041430	-1.97274	glutamine synthetase, putative
AFLA_041440	1.01637	dienelactone hydrolase
AFLA_041760	1.35037	hypothetical protein
AFLA_041920	2.01462	ankyrin repeat protein
AFLA_042030	-2.64982	C6 transcription factor, putative
AFLA_042720	1.27179	hypothetical protein
AFLA_043210	-1.188	RNA processing protein Grc3, putative
AFLA_043310	2.01541	hypothetical protein
AFLA_043350	-1.15579	37S ribosomal protein Rsm22
AFLA_043870	-1.23038	hypothetical protein
AFLA_043920	2.67523	alpha-tubulin suppressor protein Aats1, putative
AFLA_044250	2.74594	hypothetical protein
AFLA_044580	1.16744	hypothetical protein
AFLA_044900	1.13374	hypothetical protein
AFLA_045880	-1.70992	D-amino acid oxidase, putative
AFLA_045940	-1.63028	hypothetical protein
AFLA_046070	1.79224	sugar transporter, putative
AFLA_046500	-1.47701	carboxylesterase, putative
AFLA_046760	-1.75853	glycerol 3-phosphate dehydrogenase (GfdB), putative
AFLA_054780	-1.05076	splicing factor 3b subunit 4
AFLA_055270	2.21269	hypothetical protein
AFLA_055590	-2.25099	mitochondrion biogenesis protein Mmm1, putative
AFLA_056280	-2.24433	hypothetical protein
AFLA_056410	-1.00633	hypothetical protein
AFLA_056460	-1.61617	histidine kinase 1, 2, 3 plant, putative
AFLA_056560	-1.55674	SNF2 family helicase/ATPase, putative
AFLA_056800	-1.9738	DnaJ domain protein Psi, putative
AFLA_056970	-1.64015	hypothetical protein
AFLA_057400	2.00265	HPP family protein
AFLA_057650	-1.09844	phenylacetyl-CoA ligase, putative
AFLA_058040	-1.00633	hypothetical protein
AFLA_058060	1.13374	alpha-acetolactate decarboxylase, putative
AFLA_058490	-1.02375	hypothetical protein
AFLA_058900	1.51616	UDP-glucose-4-epimerase, putative
AFLA_058920	1.59253	hypothetical protein
AFLA_058930	-1.9738	hypothetical protein
AFLA_059460	-1.67754	hypothetical protein
AFLA_060430	-1.76191	hypothetical protein
AFLA_060450	1.18763	O-methyltransferase, putative
AFLA_061600	2.97654	hypothetical protein
AFLA_061730	2.40351	hypothetical protein
AFLA_061740	-2.35027	C2H2 finger and ankyrin domain protein, putative
AFLA_062170	1.06631	AI-BP family protein
AFLA_062370	1.95211	mitochondrial outer membrane translocase receptor (TOM70), putative
AFLA_062930	1.4785	glycosyl hydrolase, family 43, putative
AFLA_063370	-3.70329	hypothetical protein
AFLA_064680	-1.463	hypothetical protein
AFLA_064920	-1.80762	1,3-beta-glucanosyltransferase gel4 precursor, putative
AFLA_064990	1.19002	hypothetical protein
AFLA_066190	-1.463	4-coumarate:CoA ligase, putative
AFLA_066400	1.32652	sarcosine oxidase, putative
AFLA_066560	1.09032	long-chain-fatty-acid CoA ligase, putative
AFLA_066590	1.44341	hypothetical protein
AFLA_067000	1.8924	SCP-like extracellular protein, putative
AFLA_067810	1.82722	mitochondrial import receptor subunit tom22
AFLA_067880	-1.9738	MFS transporter, putative
AFLA_067890	-2.92004	dimethylaniline monooxygenase, putative
AFLA_068160	1.18763	4-hydroxyphenylpyruvate dioxygenase, putative
AFLA_068180	-2.706	ethanolamine kinase, putative
AFLA_068820	-1.0195	hypothetical protein
AFLA_069210	2.53635	DNA polymerase POL4, putative
AFLA_069290	-1.15882	hypothetical protein
AFLA_069330	2.15287	nonribosomal peptide synthase Pes1
AFLA_069410	-1.56564	RNase L inhibitor of the ABC superfamily, putative
AFLA_069470	-1.74164	hypothetical protein
AFLA_070020	1.36068	alpha-L-arabinofuranosidase
AFLA_070030	2.07659	sugar transporter, putative
AFLA_070040	2.29655	MFS sugar transporter, putative
AFLA_070090	-1.74089	hypothetical protein
AFLA_070120	-2.19594	hypothetical protein
AFLA_070910	1.95838	aminotransferase, putative
AFLA_071070	-1.00633	DUF1716 domain protein
AFLA_071220	-1.28928	hypothetical protein
AFLA_071620	1.74734	ATP12 protein, putative
AFLA_071680	2.04313	cell cycle control protein TINC, putative
AFLA_072280	-1.13225	hypothetical protein
AFLA_072910	1.88623	conserved hypothetical protein
AFLA_073250	2.2505	hypothetical protein
AFLA_073790	1.97973	alcohol dehydrogenase, zinc-containing
AFLA_074090	-1.35843	hypothetical protein
AFLA_075320	1.01637	C6 transcription factor, putative
AFLA_075420	2.62945	homeobox protein meis, putative
AFLA_075850	-2.22104	conserved hypothetical protein
AFLA_076070	1.06412	septin AspB
AFLA_076370	-2.77737	ankyrin repeat-containing protein, putative
AFLA_076740	1.15738	conserved hypothetical protein
AFLA_076820	2.11538	glucose oxidase, putative
AFLA_076860	-1.57819	MOSC domain protein
AFLA_076880	-1.43021	stearic acid desaturase (SdeA), putative
AFLA_077080	1.51675	conserved hypothetical protein
AFLA_077220	1.7108	NADPH flavin oxidoreductase, putative
AFLA_077730	-3.29043	carnitinyl-CoA dehydratase, putative
AFLA_078260	1.54041	OPA3 domain protein
AFLA_078300	-1.76191	chitin synthase activator (Chs3), putative
AFLA_078410	1.16744	conserved hypothetical protein
AFLA_078470	-1.73704	hypothetical protein
AFLA_079550	2.10434	group II pyridoxal-5-phosphate decarboxylase, putative
AFLA_079840	1.23955	conserved hypothetical protein
AFLA_080380	1.01546	conserved hypothetical protein
AFLA_080400	2.63096	conserved hypothetical protein
AFLA_080450	-1.9104	cell cycle control protein (Cwf22), putative
AFLA_080640	2.88926	mRNA cleavage and polyadenylation specificity factor complex subunit
AFLA_080900	-1.52721	aspartyl-tRNA synthetase, cytoplasmic
AFLA_080910	1.25287	conserved hypothetical protein
AFLA_080940	1.3396	P-type ATPase, putative
AFLA_081040	2.36177	AAA family ATPase Rvb2/Reptin, putative
AFLA_081780	-2.35027	hypothetical protein
AFLA_081950	1.59491	monooxygenase, putative
AFLA_082140	-1.74164	hypothetical protein
AFLA_082150	1.70953	polyketide synthase, putative
AFLA_082380	-2.43895	alcohol dehydrogenase, putative
AFLA_082610	1.17447	conserved hypothetical protein
AFLA_083080	-2.05045	histidine acid phosphatase, putative
AFLA_083820	-2.38468	C6 finger domain protein, putative
AFLA_083950	-1.00679	MFS multidrug transporter, putative
AFLA_083970	1.28361	hypothetical protein
AFLA_084190	-1.49164	conserved hypothetical protein
AFLA_084370	-1.11849	conserved hypothetical protein
AFLA_084380	1.82059	Hsp70 family protein
AFLA_084460	-1.56564	heat shock protein Hsp98/Hsp104/ClpA, putative
AFLA_084520	-4.12064	conserved hypothetical protein
AFLA_084770	1.17447	cAMP-specific phosphodiesterase, putative
AFLA_084890	-2.7789	aspartyl protease, putative
AFLA_085410	1.9497	conserved hypothetical protein
AFLA_085460	-1.27502	conserved hypothetical protein
AFLA_085950	1.98697	alcohol dehydrogenase, putative
AFLA_086230	-2.17428	conserved hypothetical protein
AFLA_086590	1.38355	transcription factor smp1, putative
AFLA_086950	1.33762	conserved hypothetical protein
AFLA_087170	-1.71263	extracellular serine-rich protein, putative
AFLA_087310	-1.9738	conserved hypothetical protein
AFLA_087510	-1.80165	conserved hypothetical protein
AFLA_087550	-2.2708	serine/threonine protein phosphatase, putative
AFLA_087590	-2.41252	alpha-1,3-glucanase/mutanase, putative
AFLA_088000	-1.24194	NAD dependent epimerase/dehydratase, putative
AFLA_088070	1.42117	ABC transporter (Adp1), putative
AFLA_089090	2.13465	actin cytoskeleton organization and biogenesis protein, putative
AFLA_089120	2.06316	inositol monophosphatase, putative
AFLA_089490	1.60396	cytochrome b5 reductase, putative
AFLA_089680	1.32358	hypothetical protein
AFLA_091130	1.79895	hypothetical protein
AFLA_091400	2.53075	2-dehydropantoate 2-reductase, putative
AFLA_092020	1.83715	hypothetical protein
AFLA_092050	-1.11849	hypothetical protein
AFLA_092580	1.2746	kinesin family protein
AFLA_092610	3.34752	hypothetical protein
AFLA_092790	1.72038	dicer-1, putative
AFLA_093390	1.43256	WD repeat protein
AFLA_093590	-1.16618	arrestin (or S-antigen), N-terminal domain protein
AFLA_093650	1.47825	GTP binding protein (GTPBP1), putative
AFLA_093660	1.06631	solid-state culture expressed protein (Aos23), putative
AFLA_094420	-2.17065	pH signal transduction protein PalH
AFLA_095210	-1.65877	methionine aminopeptidase, type I, putative
AFLA_095600	2.70277	hypothetical protein
AFLA_095770	1.50122	WD domain, G-beta repeat protein
AFLA_096080	-2.1919	hypothetical protein
AFLA_096650	2.33995	hypothetical protein
AFLA_097390	1.80384	hypothetical protein
AFLA_097520	2.90158	ABC multidrug transporter, putative
AFLA_097680	-1.9738	C6 transcription factor, putative
AFLA_098220	1.16744	tRNA exportin, putative
AFLA_098280	-5.24409	hypothetical protein
AFLA_098310	1.18763	small monomeric GTPase (Gtr1), putative
AFLA_098410	-1.48041	hypothetical protein
AFLA_098640	-1.56266	isoflavone reductase family protein
AFLA_099000	-1.2403	Cu,Zn superoxide dismutase SOD1
AFLA_099140	-1.74089	hypothetical protein
AFLA_099330	1.17447	transcription factor (SPT8), putative
AFLA_099370	2.00265	cortactin-binding protein, putative
AFLA_099680	1.59652	hypothetical protein
AFLA_099840	1.01546	hypothetical protein
AFLA_100740	2.66685	hypothetical protein
AFLA_101030	1.01637	hypothetical protein
AFLA_101580	1.01546	hypothetical protein
AFLA_101940	-1.09294	multidrug resistance-associated protein 2, 6 (mrp2, 6), ABC-transporter, putative
AFLA_101990	2.10287	MFS sugar transporter, putative
AFLA_102140	-1.11849	hypothetical protein
AFLA_102840	1.15738	hypothetical protein
AFLA_103020	1.16219	GDP/GTP exchange factor Sec2p, putative
AFLA_103080	-3.26264	histone-lysine N-methyltransferase (Ash1), putative
AFLA_103260	-1.12718	hypothetical protein
AFLA_103980	-1.00727	DnaJ and TPR domain protein
AFLA_104690	-1.463	hypothetical protein
AFLA_104870	1.37076	integral membrane protein, putative
AFLA_105120	1.18763	GNAT family acetyltransferase, putative
AFLA_105510	-2.21691	hypothetical protein
AFLA_105810	1.25016	hypothetical protein
AFLA_105890	-1.13286	hypothetical protein
AFLA_106140	1.64687	hypothetical protein
AFLA_106580	2.33526	hypothetical protein
AFLA_106680	1.09009	chitin deacetylase, putative
AFLA_106830	1.06631	sensor histidine kinase/response regulator Fos-1/TcsA
AFLA_107070	1.44294	alpha-glucosidase, putative
AFLA_107800	1.11809	exo-beta-1,3-glucanase, putative
AFLA_107890	1.34858	hypothetical protein
AFLA_107900	-2.17428	hypothetical protein
AFLA_108510	-2.64856	hypothetical protein
AFLA_108700	-1.4168	aminotransferase GliI-like, putative
AFLA_108900	-2.51238	ABC transporter, putative
AFLA_108920	1.32652	hypothetical protein
AFLA_108930	-1.463	hypothetical protein
AFLA_109340	1.92748	cell morphogenesis protein pag, putative
AFLA_110100	1.78024	hypothetical protein
AFLA_110260	-1.57314	flavin-binding monooxygenase-like protein
AFLA_110320	1.01546	hypothetical protein
AFLA_110580	1.00861	lysine-rich arabinogalactan protein 19 precursor, putative
AFLA_110990	-1.463	short chain dehydrogenase, putative
AFLA_111000	-1.04763	hypothetical protein
AFLA_111250	2.86805	hypothetical protein
AFLA_112050	-1.11849	cation chloride cotransporter, putative
AFLA_112240	-1.00633	60S ribosomal protein L34
AFLA_112430	1.13374	sensor histidine kinase/response regulator, putative
AFLA_112590	1.52581	RAM signalling pathway protein domain-containing protein
AFLA_112870	1.26618	monooxygenase, putative
AFLA_113200	-1.19912	serine-threonine kinase SepH
AFLA_113270	1.3396	acid sphingomyelinase, putative
AFLA_113390	-2.44949	hypothetical protein
AFLA_113450	1.06959	bZIP transcription factor (MetR), putative
AFLA_113540	1.32454	hypothetical protein
AFLA_114510	1.3396	hypothetical protein
AFLA_114520	-2.03909	hypothetical protein
AFLA_114770	1.70953	hypothetical protein
AFLA_114980	-1.58225	THO complex subunit Tho1, putative
AFLA_115100	-1.97585	hypothetical protein
AFLA_115830	-2.76565	hypothetical protein
AFLA_116290	1.39974	hypothetical protein
AFLA_116470	-1.761	hypothetical protein
AFLA_116680	3.22639	white collar, putative
AFLA_116770	2.05365	extracellular lipase, putative
AFLA_116850	2.47528	Ankyrin domain protein
AFLA_117670	1.00334	glycosyl transferase, putative
AFLA_117820	1.01546	C6 transcription factor, putative
AFLA_118270	1.68057	beta-lactamase
AFLA_118500	2.41025	period circadian protein, putative
AFLA_118900	3.49408	hypothetical protein
AFLA_119070	-1.00633	hypothetical protein
AFLA_119520	2.4273	arrestin domain containing protein, putative
AFLA_119690	-1.9738	hypothetical protein
AFLA_120230	1.74529	short-chain dehydrogenase, putative
AFLA_120430	-2.77737	amino acid transporter, putative
AFLA_120870	4.16264	hypothetical protein
AFLA_120900	-1.463	integral membrane protein
AFLA_122010	1.27471	methylaspartate ammonia-lyase, putative
AFLA_122350	-1.11849	monoxygenase, putative
AFLA_122500	1.1732	C6 transcription factor, putative
AFLA_122570	1.50832	C6 transcription factor, putative
AFLA_131200	1.19969	YT521-B-like splicing factor, putative
AFLA_131770	1.26618	extracellular exo-polygalacturonase, putative
AFLA_131850	2.08859	G-protein beta WD-40 repeats containing protein, putative
AFLA_131890	1.54733	hypothetical protein
AFLA_132420	-2.54824	PTH11-like integral membrane protein
AFLA_132430	-3.4241	polyglutamate biosynthesis protein, putative
AFLA_132730	2.4142	hypothetical protein
AFLA_133340	-1.463	hypothetical protein
AFLA_133570	-3.13701	hypothetical protein
AFLA_133640	1.01637	hypothetical protein
AFLA_134150	3.37252	hypothetical protein
AFLA_134610	-3.52867	mitochondrial serine protease Pim1, putative
AFLA_134830	1.13374	phospholipase A2 (PlaA), putative
AFLA_134840	-1.08779	phosphoinositide phosphatase Pten/Tep1, putative
AFLA_134850	1.79446	hypothetical protein
AFLA_135850	1.74734	hypothetical protein
AFLA_136030	2.14133	chitin synthase ChsE
AFLA_136410	-1.19912	transcriptional regulator Medusa
AFLA_136680	3.3641	hypothetical protein
AFLA_136740	1.55036	2-methylcitrate dehydratase (PrpD), putative
AFLA_136900	-2.89562	hypothetical protein
AFLA_137660	-2.17428	hypothetical protein
AFLA_138680	-1.91841	pentachlorophenol 4-monooxygenase, putative
AFLA_139170	-2.71945	aflW/ moxY/ monooxygenase
AFLA_139340	-1.9738	aflS/ pathway regulator
AFLA_139360	-1.33229	aflR / apa-2 / afl-2 / transcription activator
AFLA_139370	-1.76069	aflB / fas-1 / fatty acid synthase beta subunit
AFLA_139380	1.27602	aflA / fas-2 / hexA / fatty acid synthase alpha subunit

## Sheet: delrmtA_virulence_DOWN
AFLA_ID	Expression	Description
AFLA_000330	1.90857	Ankyrin domain protein
AFLA_000640	2.44094	polyamine oxidase, putative
AFLA_000840	1.06631	efflux pump antibiotic resistance protein, putative
AFLA_000860	2.47829	tripeptidyl peptidase A
AFLA_001100	1.43835	hypothetical protein
AFLA_001110	-1.18382	hypothetical protein
AFLA_001640	-1.3833	glycosyl hydrolase, putative
AFLA_001660	-1.07998	hypothetical protein
AFLA_001800	2.48648	hypothetical protein
AFLA_001930	1.10747	luciferase, putative
AFLA_003100	-1.88514	C2H2 finger domain protein, putative
AFLA_003650	1.39974	uracil phosphoribosyltransferase
AFLA_003760	1.88623	NACHT domain protein
AFLA_004670	1.69867	zinc-binding oxidoreductase, putative
AFLA_005760	-1.11849	hypothetical protein
AFLA_006020	-1.29166	hypothetical protein
AFLA_006150	1.13374	flavin dependent monooxygenase, putative
AFLA_006170	-1.39569	polyketide synthetase PksP
AFLA_006270	-1.08459	tRNA-guanine transglycosylase family protein
AFLA_006460	-2.64856	hypothetical protein
AFLA_008130	1.34971	MFS transporter, putative
AFLA_008390	1.16744	hypothetical protein
AFLA_008600	-2.17428	hypothetical protein
AFLA_008720	1.73932	hypothetical protein
AFLA_009020	3.02093	cytochrome c peroxidase, putative
AFLA_009030	-1.15231	hypothetical protein
AFLA_009160	1.65185	hypothetical protein
AFLA_009350	-1.13079	translation initiation inhibitor, putative
AFLA_009410	2.29578	delta(3,5)-delta(2,4)-dienoyl-CoA isomerase, mitochondrial precursor, putative
AFLA_010910	-2.89562	FKBP-type peptidyl-prolyl isomerase, putative
AFLA_010940	1.93948	urea hydro-lyase/cyanamide hydratase, putative
AFLA_010950	2.53124	cytochrome P450 oxidoreductase, putative
AFLA_011210	2.26924	hypothetical protein
AFLA_012020	2.79742	carboxypeptidase S1, putative
AFLA_012100	-1.85344	NDT80_PhoG domain protein PcaG
AFLA_012190	-2.54824	C6 finger domain protein, putative
AFLA_012270	1.1071	peptidyl-prolyl cis-trans isomerase, putative
AFLA_012420	-1.89361	hypothetical protein
AFLA_013550	-1.24853	hypothetical protein
AFLA_014110	2.54955	conserved hypothetical protein
AFLA_014280	2.9194	conserved hypothetical protein
AFLA_014380	1.39207	glutamate carboxypeptidase, putative
AFLA_014420	1.01637	gluconate 5-dehydrogenase, putative
AFLA_014940	-1.84355	alcohol dehydrogenase, zinc-containing
AFLA_015610	2.60857	conserved hypothetical protein
AFLA_015790	-1.85486	C6 transcription factor (Leu3), putative
AFLA_016580	-2.17428	conserved hypothetical protein
AFLA_016730	2.4357	alanine racemase
AFLA_016880	-1.58873	ubiquitin conjugating enzyme, putative
AFLA_016930	1.15738	O-methyltransferase, putative
AFLA_017070	-1.11849	sterol glucosyltransferase, putative
AFLA_017250	2.2141	FAD monooxygenase, putative
AFLA_017290	1.08649	conserved hypothetical protein
AFLA_017390	-1.36065	diphthine synthase, putative
AFLA_017400	3.44394	SAGA-like transcriptional regulatory complex subunit Spt3, putative
AFLA_017750	2.05868	conserved hypothetical protein
AFLA_017870	1.6612	GTP-binding protein
AFLA_017970	1.25016	conserved hypothetical protein
AFLA_018070	-1.02564	MFS transporter, putative
AFLA_018790	1.16219	nitrate transporter CrnA
AFLA_018800	1.22072	nitrite reductase NiiA
AFLA_018910	-1.46658	elastase, putative
AFLA_019080	-2.51349	hypothetical protein
AFLA_019120	-1.14631	conserved hypothetical protein
AFLA_019700	1.2929	conserved hypothetical protein
AFLA_020030	3.94267	conserved hypothetical protein
AFLA_020190	-1.52721	hypothetical protein
AFLA_020900	1.2929	major centromere autoantigen B, putative
AFLA_021470	-2.50711	conserved hypothetical protein
AFLA_021850	2.66325	maleylacetate reductase, putative
AFLA_022230	-2.96363	DSBA-like thioredoxin domain protein
AFLA_022500	-1.49118	hypothetical protein
AFLA_023080	-2.34981	integral membrane protein TmpA
AFLA_024020	-1.9738	amino acid permease, putative
AFLA_024280	1.94284	cell wall glycosyl hydrolase Dfg5, putative
AFLA_024300	1.8861	amidase, putative
AFLA_024380	-1.00992	fatty-acid amide hydrolase, putative
AFLA_024600	2.33405	short chain oxidoreductase (CsgA), putative
AFLA_024700	2.12207	short-chain alcohol dehydrogenase, putative
AFLA_024720	1.34414	MFS transporter, putative
AFLA_024860	-1.11849	MATH and UCH domain protein, putative
AFLA_024920	1.92743	DUF221 domain protein, putative
AFLA_024980	-1.36516	hypothetical protein
AFLA_025280	-1.49074	hypothetical protein
AFLA_025380	1.21873	conserved hypothetical protein
AFLA_025390	-1.15825	high affinity zinc ion transporter, putative
AFLA_025400	1.44294	pectin lyase D precursor, putative
AFLA_025510	2.66085	GPI anchored protein, putative
AFLA_025890	-2.03241	inositol-pentakisphosphate 2-kinase, putative
AFLA_025970	1.7831	ABC multidrug transporter Mdr2
AFLA_026020	2.25756	calmodulin
AFLA_026350	-2.31635	conserved hypothetical protein
AFLA_026690	1.01546	histone acetylase complex subunit MRG15-2
AFLA_027050	1.51675	cystathionine gamma-synthase, putative
AFLA_027350	1.19562	saccharopine dehydrogenase Lys9, putative
AFLA_027360	-1.67093	prenyltransferase, putative
AFLA_027400	1.69513	cell surface receptor/MFS transporter (FLVCR), putative
AFLA_027410	1.51675	involucrin repeat protein
AFLA_027440	1.32652	aminotransferase, classes I and II, putative
AFLA_027570	1.42547	G-patch domain protein (TFIP11), putative
AFLA_027760	1.44294	conserved hypothetical protein
AFLA_028180	2.00265	RWD domain protein (Gir2), putative
AFLA_028220	1.61156	HIT domain protein
AFLA_028380	-2.75399	conserved hypothetical protein
AFLA_028430	-1.9738	DUF726 domain protein
AFLA_029330	1.21214	RING finger domain protein, putative
AFLA_029430	2.2531	conserved hypothetical protein
AFLA_029960	-2.61859	Golgi complex component (Vps8), putative
AFLA_030240	-2.51287	methionyl-tRNA formyltransferase, putative
AFLA_030470	-2.93563	Methionine synthase, vitamin-B12 independent, putative
AFLA_030850	-1.09436	hypothetical protein
AFLA_031240	1.06631	O-methyltransferase, putative
AFLA_031310	1.44876	arsenite translocating ATPase ArsA, putative
AFLA_031890	1.4785	kinesin, putative
AFLA_032010	-1.4937	FAD binding domain protein
AFLA_032310	1.5212	conserved hypothetical protein
AFLA_032780	2.53608	serine/threonine protein kinase, putative
AFLA_033410	-2.57572	conserved hypothetical protein
AFLA_033420	-2.9375	Mn superoxide dismutase MnSOD
AFLA_033650	-1.9738	GTP-binding nuclear protein Ran, putative
AFLA_034060	-1.30135	hypothetical protein
AFLA_034090	1.07235	conserved hypothetical protein
AFLA_034140	-1.79148	monocarboxylate permease, putative
AFLA_034220	2.47603	GPI transamidase component (GAA1), putative
AFLA_034330	2.25756	beta-alanine synthase, putative
AFLA_034380	1.34858	catalase, putative
AFLA_034410	-2.17428	aspartate aminotransferase, putative
AFLA_034690	-1.74164	conserved hypothetical protein
AFLA_034900	-1.29982	hypothetical protein
AFLA_034910	1.39974	ER membrane protein (Pkr1), putative
AFLA_034930	2.26742	hypothetical protein
AFLA_035580	-1.54701	alcohol dehydrogenase, putative
AFLA_035730	-2.2708	conserved hypothetical protein
AFLA_036700	4.23187	conserved hypothetical protein
AFLA_036940	-1.53986	cytochrome P450 monooxygenase, putative
AFLA_036950	1.9413	hypothetical protein
AFLA_037160	2.52378	thiazole biosynthesis enzyme Sti35
AFLA_037730	1.92025	peptide-N4-(N-acetyl-beta-glucosaminyl)asparagine amidase A, putative
AFLA_038570	-2.35027	malonyl CoA-acyl carrier protein transacylase, putative
AFLA_038640	-1.18193	fatty acid synthase alpha subunit, putative
AFLA_039080	2.20859	MGMT family protein
AFLA_039090	2.09718	hypothetical protein
AFLA_040160	1.16744	molybdopterin cofactor sulfurase, putative
AFLA_040230	1.25614	low affinity iron transporter, putative
AFLA_040700	-1.11849	GABA permease, putative
AFLA_040850	1.11807	hypothetical protein
AFLA_040860	-1.15791	hypothetical protein
AFLA_041060	1.13374	cell wall associated protein, putative
AFLA_041170	-3.10648	hypothetical protein
AFLA_041370	1.71481	isoflavone reductase family protein
AFLA_041680	-1.41119	MFS drug transporter, putative
AFLA_042150	-1.2848	catechol dioxygenase, putative
AFLA_042170	1.33158	Golgi membrane protein (Coy1), putative
AFLA_042880	1.35037	hypothetical protein
AFLA_042930	1.2929	hypothetical protein
AFLA_043000	-1.91951	transmembrane protein UsgS
AFLA_043470	-1.9738	ankyrin repeat-containing protein, putative
AFLA_043510	-2.77737	protein kinase domain-containing protein
AFLA_043900	-1.00633	hypothetical protein
AFLA_043950	1.35037	serine/threonine protein kinase (YPK1), putative
AFLA_044040	-2.77737	amino acid permease
AFLA_044050	-1.11849	gaba-specific permease, putative
AFLA_044140	-1.38541	cytosolic regulator Pianissimo, putative
AFLA_044180	-1.65371	AAR2 family protein
AFLA_044350	1.01546	TOR pathway phosphatidylinositol 3-kinase TorA
AFLA_045260	-1.11849	hypothetical protein
AFLA_045480	-3.05228	hypothetical protein
AFLA_045490	1.58167	dimethylallyl tryptophan synthase, putative
AFLA_045680	1.63509	GNAT family acetyltransferase, putative
AFLA_045840	-1.72224	adenosine deaminase
AFLA_045870	-2.32071	hypothetical protein
AFLA_046190	1.60396	nickel transport protein, putative
AFLA_046370	1.2929	HET-s/LopB domain protein
AFLA_046770	1.70879	C6 transcription factor, putative
AFLA_047390	2.24387	PX domain protein
AFLA_054550	-1.13225	myo inositol dehydrogenase, putative
AFLA_054960	-1.69518	acetamidase
AFLA_055180	-1.49588	lysine decarboxylase-like protein
AFLA_055220	-2.59275	Hsp70 nucleotide exchange factor (Fes1), putative
AFLA_055930	-1.74089	hypothetical protein
AFLA_056180	2.35728	hypothetical protein
AFLA_056880	2.92909	DNA-directed RNA polymerase III subunit RPC7, putative
AFLA_056930	-1.13286	carboxyphosphonoenolpyruvate phosphonomutase-like protein
AFLA_057080	-1.33334	hypothetical protein
AFLA_057510	2.62735	monocarboxylate transporter, putative
AFLA_057540	1.45995	neuroligin, putative
AFLA_057580	-1.28422	hypothetical protein
AFLA_058500	-1.11849	WD-repeat protein, putative
AFLA_058970	-2.6975	cytochrome P450, putative
AFLA_059670	1.26618	hypothetical protein
AFLA_059690	2.8632	hypothetical protein
AFLA_060020	-4.61023	PKS-like enzyme, putative
AFLA_060060	-1.74089	hypothetical protein
AFLA_060580	-1.75419	NEDD8 conjugating enzyme (UbcL), putative
AFLA_060620	-2.64856	hypothetical protein
AFLA_060800	1.37283	kinesin family protein
AFLA_060880	3.17406	amino acid permease, putative
AFLA_061060	-1.44154	hypothetical protein
AFLA_061120	-1.77996	polyamine transporter, putative
AFLA_061140	-1.46382	cytochrome P450, putative
AFLA_061450	-1.63219	hypothetical protein
AFLA_061480	-1.90519	tetracycline-efflux transporter, putative
AFLA_061950	-2.17428	autophagocytosis protein Aut1, putative
AFLA_062030	-2.49785	carbonic anhydrase, putative
AFLA_062160	1.0015	polyubiquitin binding protein (Doa1/Ufd3), putative
AFLA_062230	-1.50209	hypothetical protein
AFLA_062290	1.03906	ankyrin repeat-containing protein, putative
AFLA_062360	-2.33694	FHA domain protein
AFLA_062560	1.92025	GILT family thiol reductase, putative
AFLA_063100	-1.11849	quinone oxidoreductase, putative
AFLA_063140	1.97848	hypothetical protein
AFLA_063290	3.30114	hypothetical protein
AFLA_063300	1.13374	hypothetical protein
AFLA_063410	1.60396	hypothetical protein
AFLA_064330	-1.28422	hypothetical protein
AFLA_064340	-1.39338	hypothetical protein
AFLA_064360	1.65992	ABC multidrug transporter, putative
AFLA_064600	-1.11849	hypothetical protein
AFLA_064800	-1.20274	MFS monosaccharide transporter, putative
AFLA_065730	-1.51713	guanine deaminase, putative
AFLA_065930	-1.50249	pantothenate transporter, putative
AFLA_066110	1.74734	bicyclomycin resistance protein, putative
AFLA_066280	-2.35027	hypothetical protein
AFLA_066450	-1.45664	GTP cyclohydrolase I, putative
AFLA_066840	1.49366	hybrid PKS/NRPS enzyme, putative
AFLA_067550	1.95725	1,4-beta-D-glucan-cellobiohydrolyase, putative
AFLA_067910	1.8769	HLH transcription factor, putative
AFLA_068260	-2.20272	vacuolar endopolyphosphatase, putative
AFLA_068670	-2.28403	purine-cytosine permease, putative
AFLA_068860	-1.11849	hypothetical protein
AFLA_068950	-1.26062	M protein repeat protein
AFLA_068990	-2.31057	hypothetical protein
AFLA_069440	3.06854	pyridoxal reductase (AKR8), putative
AFLA_069700	1.26918	C2H2 transcription factor, putative
AFLA_070330	1.94788	kinesin light chain, putative
AFLA_071250	1.51726	membrane associated DnaJ chaperone, putative
AFLA_071490	-1.60169	hypothetical protein
AFLA_071540	1.26257	hypothetical protein
AFLA_071790	3.97701	galactose oxidase, putative
AFLA_071800	1.35046	branched-chain amino acid aminotransferase, putative
AFLA_072640	1.82059	gluconate 5-dehydrogenase, putative
AFLA_072780	1.26618	sarcosine oxidase, putative
AFLA_073240	-1.9738	conserved hypothetical protein
AFLA_073660	1.39974	alcohol dehydrogenase
AFLA_073840	1.39974	Na/K ATPase alpha 1 subunit, putative
AFLA_074370	1.08649	conserved hypothetical protein
AFLA_074630	2.98137	MFS nicotinic acid transporter Tna1, putative
AFLA_074720	2.37251	conserved hypothetical protein
AFLA_074850	-1.74089	hypothetical protein
AFLA_075330	2.59886	conserved hypothetical protein
AFLA_076150	1.17447	hypothetical protein
AFLA_076530	2.79019	sugar transporter family protein
AFLA_076900	-2.16414	conserved hypothetical protein
AFLA_077010	1.65692	integral membrane protein, putative
AFLA_077590	-1.74164	conserved hypothetical protein
AFLA_077920	1.08649	glutamate decarboxylase
AFLA_077950	1.01637	toxin biosynthesis protein (Tri7), putative
AFLA_078110	-1.11849	C-14 sterol reductase, putative
AFLA_078220	1.261	dehydrogenase, putative
AFLA_078350	-1.74089	conserved hypothetical protein
AFLA_078400	2.98026	protein phosphatase PP2A regulatory B subunit, putative
AFLA_078430	3.39404	aldehyde dehydrogenase family protein
AFLA_078480	-2.50441	cysteine protease, putative
AFLA_078590	-1.66567	extracellular matrix protein, putative
AFLA_078840	-1.51531	MFS transporter, putative
AFLA_079520	1.08649	conserved hypothetical protein
AFLA_079580	-2.54769	cytochrome b561, putative
AFLA_080210	-2.01617	sugar transporter, putative
AFLA_080800	-2.1919	F-box domain protein
AFLA_080840	-1.39569	conserved hypothetical protein
AFLA_081080	1.46208	hypothetical protein
AFLA_081720	-1.00633	conserved hypothetical protein
AFLA_081770	1.9899	conserved hypothetical protein
AFLA_081820	-1.13225	glycosyl hydrolase, putative
AFLA_081990	2.17681	conserved hypothetical protein
AFLA_082360	1.42252	conserved hypothetical protein
AFLA_082430	-1.9738	conserved hypothetical protein
AFLA_082890	1.25016	ribonuclease T2, putative
AFLA_083120	1.7831	thioredoxin, putative
AFLA_083610	1.47863	glutathione S-transferase, putative
AFLA_083680	1.49949	conserved fungal protein
AFLA_084010	2.02724	lactam utilization protein LamB
AFLA_084260	-1.11849	DNA replication initiation factor Cdc45
AFLA_084750	1.58903	peptidase D, putative
AFLA_084810	1.57191	conserved hypothetical protein
AFLA_084940	1.2516	conserved hypothetical protein
AFLA_085760	2.96895	conserved hypothetical protein
AFLA_086410	-1.2465	C1 tetrahydrofolate synthase, putative
AFLA_086730	1.05064	DNA replication factor C subunit Rfc2, putative
AFLA_086810	1.46507	aldo/keto reductase, putative
AFLA_087160	-1.47701	dipeptidyl aminopeptidase Ste13
AFLA_087320	1.80657	GABA permease GabA
AFLA_087620	-2.24323	NmrA family transcriptional regulator, putative
AFLA_087800	-1.56009	hypothetical protein
AFLA_088870	-1.9738	porphobilinogen synthase, putative
AFLA_089240	2.08859	glutamyl-tRNA amidotransferase, A subunit, putative
AFLA_089510	1.43835	vacuolar calcium ion transporter, putative
AFLA_089540	2.92446	hypothetical protein
AFLA_089560	1.32652	pyruvate decarboxylase, putative
AFLA_090450	-1.10358	proline oxidase Put1, putative
AFLA_090530	-1.36516	hypothetical protein
AFLA_090980	-1.40859	transcriptional activator (PtaC), putative
AFLA_091080	-1.36516	serine/threonine protein kinase (Kcc4), putative
AFLA_091760	-1.11849	C-3 sterol dehydrogenase/C-4 decarboxylase family protein
AFLA_092200	3.17951	hypothetical protein
AFLA_092210	1.35945	serine carboxypeptidase, putative
AFLA_092300	1.57191	hypothetical protein
AFLA_092860	2.48566	DUF985 domain protein
AFLA_093260	1.3396	oxidoreductase, 2OG-Fe(II) oxygenase family, putative
AFLA_093760	-2.04327	hypothetical protein
AFLA_094160	-1.11849	hypothetical protein
AFLA_094620	1.30788	hypothetical protein
AFLA_095560	1.60396	hypothetical protein
AFLA_096010	-2.10731	hypothetical protein
AFLA_096040	-1.96241	hypothetical protein
AFLA_096380	-1.47701	FAD dependent oxidoreductase, putative
AFLA_096490	2.25105	hypothetical protein
AFLA_097400	3.75466	2-amino-3-carboxymuconate-6-semialdehyde decarboxylase, putative
AFLA_097730	1.32319	hexose carrier protein, putative
AFLA_098260	-1.39839	AP-1 adaptor complex subunit mu, putative
AFLA_098430	1.98697	ankyrin repeat protein (Yar1), putative
AFLA_098450	-2.77737	DNA damage response protein Rtt109, putative
AFLA_098490	2.28601	hypothetical protein
AFLA_098540	1.01546	ABC transporter, putative
AFLA_098580	-1.11508	hypothetical protein
AFLA_098700	-1.71762	carbonyl reductase, putative
AFLA_098840	1.09032	L-amino acid oxidase, putative
AFLA_098850	1.44014	hypothetical protein
AFLA_099110	1.18763	hypothetical protein
AFLA_099780	1.0445	cell wall glucanase, putative
AFLA_100400	-1.09672	hypothetical protein
AFLA_100720	1.32358	hypothetical protein
AFLA_101280	-1.84207	MYB DNA-binding domain protein
AFLA_102010	1.57884	class V chitinase, putative
AFLA_102260	1.4785	hypothetical protein
AFLA_102270	1.2692	FAD binding oxidoreductase, putative
AFLA_102290	2.77124	mitochondrial metallochaperone Sco1, putative
AFLA_102360	2.09042	hypothetical protein
AFLA_102390	1.21873	hypothetical protein
AFLA_102640	-1.8053	exo-beta-1,3-glucanase, putative
AFLA_102780	1.57191	WD-repeat protein, putative
AFLA_103380	-1.00685	hypothetical protein
AFLA_103490	-1.40603	transcription elongation factor SPT6, putative
AFLA_103550	-1.64108	hypothetical protein
AFLA_103780	-1.15065	DNA helicase, putative
AFLA_103840	1.42686	cell cycle protein kinase, putative
AFLA_104490	-1.9738	hypothetical protein
AFLA_104640	1.01637	Asp hemolysin-like protein
AFLA_105880	1.7831	hypothetical protein
AFLA_107110	2.26478	hypothetical protein
AFLA_107410	1.8292	glucose-methanol-choline (gmc) oxidoreductase, putative
AFLA_107660	-1.74164	succinyl-CoA synthetase beta subunit, putative
AFLA_107960	-1.37695	hypothetical protein
AFLA_108050	1.21873	hypothetical protein
AFLA_108210	1.49277	hypothetical protein
AFLA_108430	-1.79444	hypothetical protein
AFLA_108990	1.43835	hypothetical protein
AFLA_109120	1.2624	protein kinase (VPS15), putative
AFLA_109150	-2.17428	C2H2 finger domain protein (Ezf), putative
AFLA_110180	-1.47701	hypothetical protein
AFLA_110220	-1.06727	hypothetical protein
AFLA_110360	-2.24323	hypothetical protein
AFLA_110380	-1.63481	hypothetical protein
AFLA_110670	1.49277	thioredoxin, putative
AFLA_110800	2.48558	telomere length regulator protein (Rif1), putative
AFLA_110820	1.93222	choline transport protein, putative
AFLA_111040	-2.35027	phytase
AFLA_111310	-1.23344	monosaccharide-P-dolichol utilization protein, putative
AFLA_112230	-1.6922	zinc metalloprotease, putative
AFLA_112380	-1.47701	integral membrane protein
AFLA_112480	2.66582	3-oxo-5-alpha-steroid 4-dehydrogenase family protein
AFLA_112840	-2.59275	polyketide synthase, putative
AFLA_112880	-1.47701	2,4-dichlorophenol 6-monooxygenase, putative
AFLA_113020	-2.81274	methionine aminopeptidase, type II, putative
AFLA_113080	1.1895	coenzyme A synthetase, putative
AFLA_113340	-1.65632	hypothetical protein
AFLA_113640	1.60396	hypothetical protein
AFLA_113730	-2.50711	progesterone binding protein, putative
AFLA_113890	3.05043	nuclear pore complex subunit (SEC13), putative
AFLA_114840	1.18763	hypothetical protein
AFLA_115010	-1.41324	TFIIH and nucleotide excision repair factor 3 complexes subunit
AFLA_115190	-2.17428	C4-dicarboxylate transporter/malic acid transport protein, putative
AFLA_116150	-1.463	integral membrane protein
AFLA_116200	2.14366	hypothetical protein
AFLA_116270	1.84464	paraoxonase, putative
AFLA_116860	1.88623	alpha-N-acetylglucosaminidase, putative
AFLA_116940	2.66325	hypothetical protein
AFLA_117500	-1.03982	hypothetical protein
AFLA_120200	2.40435	hypothetical protein
AFLA_120210	2.12395	hypothetical protein
AFLA_120950	-1.61858	glycosyl transferase, putative
AFLA_120980	2.19084	zinc finger protein, putative
AFLA_121000	-1.69898	hypothetical protein
AFLA_121080	-1.12791	(S)-2-hydroxy-acid oxidase, putative
AFLA_121110	-1.71762	hypothetical protein
AFLA_121610	-1.11849	cytochrome P450, putative
AFLA_121760	2.19084	DSBA-like thioredoxin domain protein
AFLA_122220	1.51675	aminotriazole resistance protein, putative
AFLA_122540	1.34907	hypothetical protein
AFLA_131480	-1.10758	hypothetical protein
AFLA_131910	-1.11849	hypothetical protein
AFLA_132100	1.11766	ammonium transporter, putative
AFLA_132360	-1.5614	glial factor naturation factor, putative
AFLA_132750	1.39974	hypothetical protein
AFLA_132890	1.98697	actin cytoskeleton organization protein (Cro1), putative
AFLA_133240	1.10104	TBC domain protein, putative
AFLA_133830	-2.20322	alcohol dehydrogenase, putative
AFLA_133910	-1.24498	tyrosyl-DNA phosphodiesterase, putative
AFLA_133920	1.88651	Acyl CoA binding protein family
AFLA_134120	-1.47701	orotate phosphoribosyltransferase
AFLA_134200	1.47354	autophagy protein (Atg22), putative
AFLA_134230	1.78015	hypothetical protein
AFLA_134340	-1.2846	BAR domain protein
AFLA_134370	-2.7774	acetylglutamate synthase
AFLA_134760	1.13374	hypothetical protein
AFLA_135120	-2.68774	kinetochore protein fta7, putative
AFLA_135550	1.27645	protein kinase regulator (Mob1), putative
AFLA_135600	1.50413	hypothetical protein
AFLA_136050	-2.05045	hypothetical protein
AFLA_136090	-1.43776	MFS transporter, putative
AFLA_136340	-1.53983	aminotransferase family protein (LolT), putative
AFLA_136370	1.50074	alcohol dehydrogenase, putative
AFLA_136690	2.00624	hypothetical protein
AFLA_136990	-1.075	calcium/calmodulin-dependent protein kinase, putative
AFLA_137070	-2.05045	allantoate permease, putative
AFLA_137680	-1.51713	hypothetical protein
AFLA_137770	-1.04358	UMTA methyltransferase family protein
AFLA_137850	1.7831	hypothetical protein
AFLA_138500	2.70277	glutamine synthetase bacteria, putative
AFLA_138550	1.83968	O-methyltransferase, putative
AFLA_138580	2.66414	integral membrane protein Pth11-like, putative
AFLA_138860	-2.97814	hypothetical protein
AFLA_139170	-2.71945	aflW/ moxY/ monooxygenase
AFLA_139380	1.27602	aflA / fas-2 / hexA / fatty acid synthase alpha subunit

## Sheet: OErmtA_virulence_up
AFLA_ID	Expression	Description
AFLA_000370	1.16122	hypothetical protein
AFLA_001820	-1.11849	hypothetical protein
AFLA_002520	-1.12539	hypothetical protein
AFLA_003920	1.07342	cysteine synthase (o-acetylserine (thiol)-lyase) (csase)
AFLA_004390	-3.10648	hypothetical protein
AFLA_004510	-1.01507	peroxidase, putative
AFLA_004540	-1.9738	hydrolase, carbon-nitrogen family, putative
AFLA_007030	1.49012	RNA binding protein Nrd1, putative
AFLA_007940	-1.08805	HET domain protein
AFLA_008350	1.83739	amine oxidase
AFLA_008770	1.26733	nonribosomal peptide synthase, putative
AFLA_009100	1.44863	pax transcription activation domain interacting protein, putative
AFLA_009150	-2.50711	hypothetical protein
AFLA_009460	-1.45836	hypothetical protein
AFLA_010190	-1.11849	ad-003, putative
AFLA_010700	-2.0221	hypothetical protein
AFLA_011000	-1.74089	hypothetical protein
AFLA_011380	1.16122	hypothetical protein
AFLA_011480	-1.49289	amino acid permease (Can1), putative
AFLA_011650	1.41107	hypothetical protein
AFLA_013090	1.13683	fungal specific transcription factor, putative
AFLA_013950	2.51859	hypothetical protein
AFLA_014520	1.64466	multicopper oxidase, putative
AFLA_014730	-1.25587	urease accessory protein UreD
AFLA_014780	1.82416	WD repeat protein
AFLA_015590	1.5124	conserved hypothetical protein
AFLA_015850	-1.28433	AflR-like C6 transcription factor, putative
AFLA_016150	1.20503	lipase, putative
AFLA_016170	1.70788	AMP dependent CoA ligase, putative
AFLA_016180	-2.35027	hypothetical protein
AFLA_016840	-2.31922	Mechanosensitive ion channel family
AFLA_017450	-1.69127	hypothetical protein
AFLA_017690	-1.73724	5'->3' exoribonculease Dhp1
AFLA_017860	2.24646	hypothetical protein
AFLA_018040	2.07672	glucose-methanol-choline (gmc) oxidoreductase, putative
AFLA_018080	-1.09985	DUF6 domain protein, putative
AFLA_018670	1.31915	cell wall biogenesis protein Mhp1, putative
AFLA_019110	1.62594	conserved hypothetical protein
AFLA_019470	1.13683	NmrA-like family protein
AFLA_019730	1.7476	GTPase activator protein, putative
AFLA_019740	1.18903	multidrug resistance protein 1, 2, putative
AFLA_020510	-1.11849	40S ribosomal protein S0
AFLA_020590	-1.87329	aldose 1-epimerase, putative
AFLA_020640	1.20503	conserved hypothetical protein
AFLA_020660	-2.35027	conserved hypothetical protein
AFLA_021010	-1.33724	hypothetical protein
AFLA_021030	2.01442	serine/threonine protein kinase, putative
AFLA_021200	1.20797	conserved hypothetical protein
AFLA_021260	1.41882	GPI anchored protein, putative
AFLA_021440	-1.28089	hypothetical protein
AFLA_021520	1.15567	N-acetyltransferase complex ARD1 subunit, putative
AFLA_021890	1.01255	hypothetical protein
AFLA_022270	1.51707	conserved hypothetical protein
AFLA_022480	1.43844	26S proteasome regulatory particle subunit Rpn8, putative
AFLA_023030	1.77455	cytochrome P450 oxidoreductase GliC-like, putative
AFLA_023100	-3.77036	hypothetical protein
AFLA_023250	-1.11849	conserved hypothetical protein
AFLA_023490	-1.38248	alpha-amylase, putative
AFLA_023500	-1.49807	extracellular conserved serine-rich protein
AFLA_023910	1.13683	conserved hypothetical protein
AFLA_024200	1.57424	polyamine transporter, putative
AFLA_024470	-1.36488	RNA polymerase II mediator complex component SRB4, putative
AFLA_024900	-1.31598	DNA repair protein Rad14, putative
AFLA_025360	-1.27449	epoxide hydrolase, putative
AFLA_026200	-1.18047	NAD binding Rossmann fold oxidoreductase, putative
AFLA_026570	-1.11489	conserved hypothetical protein
AFLA_026600	-1.52339	conserved hypothetical protein
AFLA_027180	1.09192	conserved hypothetical protein
AFLA_027190	1.04612	pheromone-regulated multispanning membrane protein Prm1, putative
AFLA_027220	2.21663	hypothetical protein
AFLA_027600	1.59609	O-methyltransferase, putative
AFLA_027610	-1.96589	hypothetical protein
AFLA_027770	1.14835	conserved hypothetical protein
AFLA_028210	2.98522	RNA methylase family UPF0020 protein
AFLA_028270	1.60124	esterase family protein
AFLA_028320	2.18657	vanillin dehydrogenase, putative
AFLA_028490	1.56473	conserved hypothetical protein
AFLA_028770	1.97954	conserved hypothetical protein
AFLA_028880	-1.62494	hypothetical protein
AFLA_029000	1.81304	conserved hypothetical protein
AFLA_029290	1.20431	conserved hypothetical protein
AFLA_029730	-1.3159	calmodulin-binding protein Sha1, putative
AFLA_029800	-1.26605	phospholipase D precursor, putative
AFLA_029820	3.3248	SAM domain protein
AFLA_030090	1.04285	conserved hypothetical protein
AFLA_030440	-2.29236	dynactin Arp1 p25 subunit
AFLA_030840	1.15567	RTA1 domain protein, putative
AFLA_031080	1.50601	FHA domain protein SNIP1, putative
AFLA_031220	1.9964	RNA Polymerase II CTD phosphatase Fcp1, putative
AFLA_031630	2.4782	CFIA complex component Rna14, putative
AFLA_031740	-3.28255	conserved hypothetical protein
AFLA_031790	-1.83888	bZIP transcription factor (MeaB), putative
AFLA_031830	-1.9738	ferric-chelate reductase, putative
AFLA_031910	1.93999	acetate kinase, putative
AFLA_032110	3.40327	conserved hypothetical protein
AFLA_032230	1.13683	meiotic sister chromatid recombination protein Ish1/Msc1, putative
AFLA_032330	1.52216	conserved hypothetical protein
AFLA_032710	1.50905	conserved hypothetical protein
AFLA_032890	1.31232	conserved hypothetical protein
AFLA_033000	-2.64856	hypothetical protein
AFLA_033280	1.25042	WD repeat protein
AFLA_033730	1.83198	autophagy regulatory protein Atg2, putative
AFLA_034450	1.019	WD repeat protein
AFLA_034510	-1.41519	mitochondrial carrier protein, putative
AFLA_034940	2.03655	conserved hypothetical protein
AFLA_035200	-1.12574	hypothetical protein
AFLA_035370	1.47749	WD repeat protein
AFLA_036600	1.92281	DUF500 and SH3 domain protein
AFLA_037420	1.59212	DNA 3'-phosphatase Tpp1, putative
AFLA_037440	1.39489	conserved hypothetical protein
AFLA_037780	1.57424	actin-related protein 2/3 complex subunit 1A, putative
AFLA_038930	-1.18047	hypothetical protein
AFLA_040720	-1.01115	hypothetical protein
AFLA_040740	-1.1878	flavin containing amine oxidase, putative
AFLA_040750	1.16122	hypothetical protein
AFLA_041330	2.10664	C6 transcription factor, putative
AFLA_041430	-1.14998	glutamine synthetase, putative
AFLA_041760	1.07342	hypothetical protein
AFLA_041920	1.27999	ankyrin repeat protein
AFLA_042030	-1.07127	C6 transcription factor, putative
AFLA_042720	1.30449	hypothetical protein
AFLA_042920	-1.28715	hypothetical protein
AFLA_043310	1.81304	hypothetical protein
AFLA_043390	1.90117	Hsp70 chaperone (BiP), putative
AFLA_043440	-1.16201	hypothetical protein
AFLA_043920	1.58967	alpha-tubulin suppressor protein Aats1, putative
AFLA_044130	-2.17428	hypothetical protein
AFLA_044250	1.25042	hypothetical protein
AFLA_045550	-1.463	hypothetical protein
AFLA_045640	1.20503	hydrolase, putative
AFLA_045710	-1.12254	C6 finger domain protein, putative
AFLA_045940	-2.28639	hypothetical protein
AFLA_046070	1.26749	sugar transporter, putative
AFLA_046500	-1.74089	carboxylesterase, putative
AFLA_046870	1.9833	hypothetical protein
AFLA_054010	-1.94339	siderochrome-iron transporter, putative
AFLA_054720	2.0849	hypothetical protein
AFLA_054780	-1.1202	splicing factor 3b subunit 4
AFLA_055260	-1.35415	leucine rich repeat and nacht domain-containing protein, putative
AFLA_055270	1.36396	hypothetical protein
AFLA_055470	-1.463	hypothetical protein
AFLA_055590	-2.02094	mitochondrion biogenesis protein Mmm1, putative
AFLA_056410	-1.18047	hypothetical protein
AFLA_056590	1.18122	hypothetical protein
AFLA_056800	-1.9738	DnaJ domain protein Psi, putative
AFLA_056970	-2.24808	hypothetical protein
AFLA_057000	1.56831	MFS drug efflux transporter, putative
AFLA_057320	1.20431	cytochrome P450, putative
AFLA_057400	1.43782	HPP family protein
AFLA_057650	-1.54365	phenylacetyl-CoA ligase, putative
AFLA_058040	-1.16201	hypothetical protein
AFLA_058380	1.06151	hypothetical protein
AFLA_058560	-1.00455	actin polymerization protein Bzz1, putative
AFLA_058930	-1.09163	hypothetical protein
AFLA_059750	1.10466	hypothetical protein
AFLA_059800	1.3625	glutathione-dependent formaldehyde-activating enzyme, putative
AFLA_061650	1.13683	hypothetical protein
AFLA_061730	1.50369	hypothetical protein
AFLA_061740	-1.25835	C2H2 finger and ankyrin domain protein, putative
AFLA_062170	1.73772	AI-BP family protein
AFLA_062370	2.1704	mitochondrial outer membrane translocase receptor (TOM70), putative
AFLA_063370	-2.31302	hypothetical protein
AFLA_063550	-1.30384	hypothetical protein
AFLA_063680	1.07342	esterase, putative
AFLA_065190	-1.57785	endo-1,4-beta-xylanase (XynG1), putative
AFLA_066190	-1.463	4-coumarate:CoA ligase, putative
AFLA_066250	2.75503	hypothetical protein
AFLA_066560	1.88123	long-chain-fatty-acid CoA ligase, putative
AFLA_067570	-1.11849	arrestin domain protein
AFLA_067780	1.70696	serine palmitoyltransferase 2, putative
AFLA_068160	1.20503	4-hydroxyphenylpyruvate dioxygenase, putative
AFLA_068180	-1.65159	ethanolamine kinase, putative
AFLA_068410	-1.463	Sterol desaturase family
AFLA_069140	-1.463	SIR2 family histone deacetylase (Hst4), putative
AFLA_069210	2.18016	DNA polymerase POL4, putative
AFLA_069290	-1.53134	hypothetical protein
AFLA_069330	1.25824	nonribosomal peptide synthase Pes1
AFLA_069470	-1.08295	hypothetical protein
AFLA_070040	1.04289	MFS sugar transporter, putative
AFLA_070060	-1.18244	hypothetical protein
AFLA_070090	-1.74089	hypothetical protein
AFLA_070120	-1.82612	hypothetical protein
AFLA_070660	1.69421	hypothetical protein
AFLA_071070	-1.463	DUF1716 domain protein
AFLA_071220	-2.9267	hypothetical protein
AFLA_071620	2.34367	ATP12 protein, putative
AFLA_071680	2.89892	cell cycle control protein TINC, putative
AFLA_073250	1.12398	hypothetical protein
AFLA_075260	1.019	sugar transporter, putative
AFLA_075420	1.07342	homeobox protein meis, putative
AFLA_075510	-1.08305	general amidase, putative
AFLA_075850	-1.5211	conserved hypothetical protein
AFLA_076350	2.00089	conserved hypothetical protein
AFLA_076370	-2.49485	ankyrin repeat-containing protein, putative
AFLA_076410	-1.463	conserved hypothetical protein
AFLA_076730	1.45815	conserved hypothetical protein
AFLA_076880	-1.12106	stearic acid desaturase (SdeA), putative
AFLA_077080	1.49012	conserved hypothetical protein
AFLA_077420	-1.48882	CAIB/BAIF family enzyme
AFLA_077500	1.15567	hypothetical protein
AFLA_077730	-3.29043	carnitinyl-CoA dehydratase, putative
AFLA_078260	1.6164	OPA3 domain protein
AFLA_078300	-2.47638	chitin synthase activator (Chs3), putative
AFLA_079030	1.50402	hypothetical protein
AFLA_079130	1.28515	ribonuclease P complex subunit Pop2, putative
AFLA_079360	-1.34589	PKS-like enzyme, putative
AFLA_079550	1.80647	group II pyridoxal-5-phosphate decarboxylase, putative
AFLA_079650	1.27839	sensor histidine kinase/response regulator, putative
AFLA_080400	3.19647	conserved hypothetical protein
AFLA_080450	1.48536	cell cycle control protein (Cwf22), putative
AFLA_080640	1.9833	mRNA cleavage and polyadenylation specificity factor complex subunit
AFLA_080900	-1.67271	aspartyl-tRNA synthetase, cytoplasmic
AFLA_081510	-1.55663	conserved hypothetical protein
AFLA_081780	-2.35027	hypothetical protein
AFLA_081950	2.06575	monooxygenase, putative
AFLA_082090	-1.74089	conserved hypothetical protein
AFLA_082380	-2.3121	alcohol dehydrogenase, putative
AFLA_082470	2.18911	AMP dependent CoA ligase, putative
AFLA_082750	-1.11849	hypothetical protein
AFLA_082790	-1.22746	conserved hypothetical protein
AFLA_083080	-1.35145	histidine acid phosphatase, putative
AFLA_083280	1.09192	hypothetical protein
AFLA_083820	-2.64856	C6 finger domain protein, putative
AFLA_084190	-1.72299	conserved hypothetical protein
AFLA_084370	-1.11849	conserved hypothetical protein
AFLA_084460	-1.21555	heat shock protein Hsp98/Hsp104/ClpA, putative
AFLA_084770	1.07342	cAMP-specific phosphodiesterase, putative
AFLA_084890	-1.13416	aspartyl protease, putative
AFLA_085340	1.50402	hypothetical protein
AFLA_085950	1.32467	alcohol dehydrogenase, putative
AFLA_086200	1.09192	betaine-aldehyde dehydrogenase, putative
AFLA_086230	-1.49807	conserved hypothetical protein
AFLA_087170	-2.16706	extracellular serine-rich protein, putative
AFLA_087590	-1.50717	alpha-1,3-glucanase/mutanase, putative
AFLA_087850	1.48474	conserved hypothetical protein
AFLA_088210	1.42727	hypothetical protein
AFLA_088440	-1.25587	RNA polymerase-associated protein LEO1, putative
AFLA_088550	1.4814	phospholipid methyltransferase
AFLA_089120	1.44863	inositol monophosphatase, putative
AFLA_089300	-1.97653	hypothetical protein
AFLA_089490	1.46374	cytochrome b5 reductase, putative
AFLA_089550	1.20503	endoglucanase, putative
AFLA_090290	1.64956	hypothetical protein
AFLA_090800	2.51701	hypothetical protein
AFLA_091160	1.09285	hypothetical protein
AFLA_091400	2.73009	2-dehydropantoate 2-reductase, putative
AFLA_091480	1.33647	hypothetical protein
AFLA_091500	1.15567	beta galactosidase, putative
AFLA_091800	1.07705	hypothetical protein
AFLA_092020	1.99381	hypothetical protein
AFLA_092150	-1.22321	hypothetical protein
AFLA_092460	2.12681	bZIP transcription factor, putative
AFLA_092550	1.019	hypothetical protein
AFLA_092610	3.19258	hypothetical protein
AFLA_092930	-1.463	hypothetical protein
AFLA_093390	1.66527	WD repeat protein
AFLA_093590	-2.35402	arrestin (or S-antigen), N-terminal domain protein
AFLA_093980	-1.67281	C6 finger domain protein, putative
AFLA_094050	-1.1877	DNA polymerase alpha/primase associated subunit
AFLA_095600	1.9964	hypothetical protein
AFLA_095620	1.13573	CCCH finger DNA binding protein, putative
AFLA_095850	1.019	hypothetical protein
AFLA_095990	-1.50626	hypothetical protein
AFLA_096080	-2.34757	hypothetical protein
AFLA_096650	1.28515	hypothetical protein
AFLA_096720	1.69454	hypothetical protein
AFLA_097390	1.49012	hypothetical protein
AFLA_097520	2.4161	ABC multidrug transporter, putative
AFLA_097680	-1.9738	C6 transcription factor, putative
AFLA_097880	1.79143	aminotransferase, putative
AFLA_098220	1.77455	tRNA exportin, putative
AFLA_098360	-2.0116	2-nitropropane dioxygenase family oxidoreductase, putative
AFLA_098410	-1.4681	hypothetical protein
AFLA_098590	-1.98223	hypothetical protein
AFLA_098640	-1.4445	isoflavone reductase family protein
AFLA_099370	2.50589	cortactin-binding protein, putative
AFLA_099400	1.17515	hypothetical protein
AFLA_099840	1.65361	hypothetical protein
AFLA_100740	1.52212	hypothetical protein
AFLA_102460	1.019	hypothetical protein
AFLA_103020	2.085	GDP/GTP exchange factor Sec2p, putative
AFLA_103130	-1.10031	hypothetical protein
AFLA_103260	-1.191	hypothetical protein
AFLA_103980	-1.89788	DnaJ and TPR domain protein
AFLA_104690	-1.463	hypothetical protein
AFLA_104720	1.16122	hypothetical protein
AFLA_105120	1.69157	GNAT family acetyltransferase, putative
AFLA_105510	-1.71235	hypothetical protein
AFLA_106140	1.84381	hypothetical protein
AFLA_106430	-2.42654	DNA repair helicase rad5,16, putative
AFLA_106580	1.49012	hypothetical protein
AFLA_106680	2.19897	chitin deacetylase, putative
AFLA_106830	1.89919	sensor histidine kinase/response regulator Fos-1/TcsA
AFLA_106950	1.79542	UMTA methyltransferase family protein
AFLA_107260	1.49012	RNA polymerase II mediator complex protein (Med7), putative
AFLA_108510	-2.64856	hypothetical protein
AFLA_108900	-2.59297	ABC transporter, putative
AFLA_108920	1.46374	hypothetical protein
AFLA_109780	1.09192	serine/threonine-protein kinase ripk4, putative
AFLA_110260	-1.25669	flavin-binding monooxygenase-like protein
AFLA_110990	-1.463	short chain dehydrogenase, putative
AFLA_111000	-1.74232	hypothetical protein
AFLA_111220	1.91037	hypothetical protein
AFLA_111250	2.70287	hypothetical protein
AFLA_112250	-1.98711	hypothetical protein
AFLA_112590	3.54698	RAM signalling pathway protein domain-containing protein
AFLA_113200	-1.463	serine-threonine kinase SepH
AFLA_113270	1.50402	acid sphingomyelinase, putative
AFLA_113390	-2.7777	hypothetical protein
AFLA_113810	1.45234	hypothetical protein
AFLA_114390	-1.049	mitochondrial ATPase (Afg1), putative
AFLA_114480	1.20431	phosphopantetheinyl transferase PptB
AFLA_114520	-1.30465	hypothetical protein
AFLA_114980	1.41153	THO complex subunit Tho1, putative
AFLA_115060	-1.48798	hypothetical protein
AFLA_116000	1.13683	phytanoyl-CoA dioxygenase family protein
AFLA_116290	2.37199	hypothetical protein
AFLA_116360	-1.21344	hypothetical protein
AFLA_116470	-2.00494	hypothetical protein
AFLA_116680	2.08019	white collar, putative
AFLA_116840	1.019	salicylate 1-monooxygenase SalA
AFLA_116850	2.98237	Ankyrin domain protein
AFLA_117280	1.10466	2-methylcitrate dehydratase (PrpD), putative
AFLA_117310	-1.64195	cytochrome P450, putative
AFLA_117420	1.58182	fatty acid synthase alpha subunit FasA, putative
AFLA_117970	1.36476	opsin, putative
AFLA_118900	1.45234	hypothetical protein
AFLA_119520	1.53261	arrestin domain containing protein, putative
AFLA_119690	-1.48878	hypothetical protein
AFLA_119790	1.06151	beta-xylosidase
AFLA_120090	-1.11849	lipopolysaccharide-induced transcription factor regulating tumor necrosis factor alpha, putative
AFLA_120430	-2.47638	amino acid transporter, putative
AFLA_120790	-1.05086	MFS transporter, putative
AFLA_120870	3.36441	hypothetical protein
AFLA_122500	1.66144	C6 transcription factor, putative
AFLA_122530	-1.24442	hypothetical protein
AFLA_131630	3.42416	hypothetical protein
AFLA_131770	1.90117	extracellular exo-polygalacturonase, putative
AFLA_131800	1.29049	flavin-binding monooxygenase, putative
AFLA_131850	1.71902	G-protein beta WD-40 repeats containing protein, putative
AFLA_131890	1.20815	hypothetical protein
AFLA_132310	1.28222	tRNA-splicing endonuclease subunit sen34
AFLA_132730	2.74945	hypothetical protein
AFLA_133280	-1.05477	alcohol dehydrogenase, zinc-containing, putative
AFLA_133340	-1.18047	hypothetical protein
AFLA_133570	-1.02003	hypothetical protein
AFLA_134320	1.3391	C6 finger domain protein, putative
AFLA_134830	2.02285	phospholipase A2 (PlaA), putative
AFLA_134840	-1.89176	phosphoinositide phosphatase Pten/Tep1, putative
AFLA_135770	1.019	DUF726 domain protein
AFLA_135860	-1.33127	hypothetical protein
AFLA_135870	1.98683	PAPA-1-like conserved region protein
AFLA_136030	1.13245	chitin synthase ChsE
AFLA_136380	-1.07918	hypothetical protein
AFLA_136410	-1.18047	transcriptional regulator Medusa
AFLA_136450	-1.15411	DnaJ domain protein
AFLA_136680	2.97125	hypothetical protein
AFLA_136900	-2.25267	hypothetical protein
AFLA_137660	-2.17428	hypothetical protein
AFLA_137740	-2.04928	hypothetical protein
AFLA_138930	1.20431	C6 transcription factor, putative
AFLA_139150	3.00838	aflY/ hypA/ hypP/ hypothetical protein
AFLA_139250	-2.89562	aflL/ verB/ desaturase/ P450 monooxygenase
AFLA_139260	2.38715	aflG/ avnA/ ord-1/ cytochrome P450 monooxygenase
AFLA_139340	-1.9738	aflS/ pathway regulator
AFLA_139360	-1.44449	aflR / apa-2 / afl-2 / transcription activator
AFLA_139400	-1.39706	aflCa / hypC / hypothetical protein
AFLA_139490	1.87091	hybrid PKS/NRPS enzyme, putative

## Sheet: OErmtA_virulence_down
AFLA_ID	Expression	Description
AFLA_000510	1.51707	hypothetical protein
AFLA_001020	1.15567	cytochrome P450 monooxygenase, putative
AFLA_001110	-1.43829	hypothetical protein
AFLA_001640	-1.64123	glycosyl hydrolase, putative
AFLA_001930	1.16802	luciferase, putative
AFLA_001950	1.45234	gluconate 5-dehydrogenase, putative
AFLA_002360	1.13893	hypothetical protein
AFLA_003100	-1.01992	C2H2 finger domain protein, putative
AFLA_003170	1.25042	caffeine resistance protein, putative
AFLA_003220	-1.11849	phospholipase D (PLD), putative
AFLA_003760	2.12681	NACHT domain protein
AFLA_005760	-1.11849	hypothetical protein
AFLA_006150	1.81304	flavin dependent monooxygenase, putative
AFLA_006170	-1.09206	polyketide synthetase PksP
AFLA_006320	-1.40549	PQ loop repeat protein
AFLA_006340	-1.18047	hypothetical protein
AFLA_006460	-2.64856	hypothetical protein
AFLA_007120	1.42927	secretion related GTPase SrgB/Ypt1
AFLA_007950	1.019	hypothetical protein
AFLA_008130	1.86175	MFS transporter, putative
AFLA_008600	-1.68927	hypothetical protein
AFLA_008640	-1.74089	ferric-chelate reductase, putative
AFLA_009020	1.72825	cytochrome c peroxidase, putative
AFLA_009160	1.9833	hypothetical protein
AFLA_009410	1.04012	delta(3,5)-delta(2,4)-dienoyl-CoA isomerase, mitochondrial precursor, putative
AFLA_010770	1.019	porphobilinogen deaminase Hem3, putative
AFLA_010910	-2.89562	FKBP-type peptidyl-prolyl isomerase, putative
AFLA_010950	1.32671	cytochrome P450 oxidoreductase, putative
AFLA_011750	1.78042	hypothetical protein
AFLA_012020	2.34367	carboxypeptidase S1, putative
AFLA_012190	-1.71975	C6 finger domain protein, putative
AFLA_012270	1.7542	peptidyl-prolyl cis-trans isomerase, putative
AFLA_012420	-1.25835	hypothetical protein
AFLA_013300	-1.81426	oxidoreductase, 2-nitropropane dioxygenase family, putative
AFLA_014110	1.01142	conserved hypothetical protein
AFLA_014280	2.35559	conserved hypothetical protein
AFLA_014940	-1.83474	alcohol dehydrogenase, zinc-containing
AFLA_015110	1.26733	conserved hypothetical protein
AFLA_015610	1.79977	conserved hypothetical protein
AFLA_015790	-2.2144	C6 transcription factor (Leu3), putative
AFLA_016540	2.13407	conserved hypothetical protein
AFLA_016580	-1.49807	conserved hypothetical protein
AFLA_016730	1.31915	alanine racemase
AFLA_016930	1.09192	O-methyltransferase, putative
AFLA_017070	-1.11849	sterol glucosyltransferase, putative
AFLA_017250	1.15903	FAD monooxygenase, putative
AFLA_017290	2.50589	conserved hypothetical protein
AFLA_017380	-1.20094	conserved hypothetical protein
AFLA_017400	1.1121	SAGA-like transcriptional regulatory complex subunit Spt3, putative
AFLA_017870	1.46478	GTP-binding protein
AFLA_018150	-1.43947	6-hexanolactone hydrolase, putative
AFLA_018800	-1.39958	nitrite reductase NiiA
AFLA_019120	-1.31969	conserved hypothetical protein
AFLA_020030	2.30752	conserved hypothetical protein
AFLA_020190	-2.13443	hypothetical protein
AFLA_020340	-1.59315	sulfate transporter, putative
AFLA_021400	1.13683	vanillate O-demethylase oxidoreductase, putative
AFLA_021470	-2.20612	conserved hypothetical protein
AFLA_021670	1.20503	ubiquitin-protein ligase (Rsp5), putative
AFLA_021740	-1.04557	conserved hypothetical protein
AFLA_021850	1.64956	maleylacetate reductase, putative
AFLA_022230	-4.10363	DSBA-like thioredoxin domain protein
AFLA_022680	-1.18047	metalloprotease MEP1
AFLA_023080	-1.81356	integral membrane protein TmpA
AFLA_023340	-1.66028	pectinesterase precursor, putative
AFLA_024020	-1.9738	amino acid permease, putative
AFLA_024280	1.46625	cell wall glycosyl hydrolase Dfg5, putative
AFLA_024300	1.12652	amidase, putative
AFLA_024380	-1.22816	fatty-acid amide hydrolase, putative
AFLA_024850	1.23746	deoxyhypusine synthase, putative
AFLA_024980	-1.9738	hypothetical protein
AFLA_025380	1.15567	conserved hypothetical protein
AFLA_025510	1.10477	GPI anchored protein, putative
AFLA_025590	1.13683	pH response protein PalF
AFLA_025890	-2.84503	inositol-pentakisphosphate 2-kinase, putative
AFLA_026020	1.50601	calmodulin
AFLA_026030	1.06151	conserved hypothetical protein
AFLA_026490	1.15567	mitochondrial peptidyl-tRNA hydrolase Pth2, putative
AFLA_026990	1.50601	SNF7 family protein (Cta1), putative
AFLA_027360	-2.47616	prenyltransferase, putative
AFLA_027440	1.83739	aminotransferase, classes I and II, putative
AFLA_027630	-1.4681	conserved hypothetical protein
AFLA_027830	-1.38179	ATP binding protein, putative
AFLA_028180	1.13683	RWD domain protein (Gir2), putative
AFLA_028220	1.94834	HIT domain protein
AFLA_028400	1.98683	conserved hypothetical protein
AFLA_028430	-1.48878	DUF726 domain protein
AFLA_028450	-1.35202	glutamate carboxypeptidase, putative
AFLA_029960	1.37596	Golgi complex component (Vps8), putative
AFLA_030470	-1.16931	Methionine synthase, vitamin-B12 independent, putative
AFLA_030710	-1.463	phosphoglucomutase PgmA
AFLA_030850	-1.44999	hypothetical protein
AFLA_031120	1.019	hypothetical protein
AFLA_031310	3.00947	arsenite translocating ATPase ArsA, putative
AFLA_031720	1.32875	peroxisomal membrane protein receptor Pex19, putative
AFLA_031840	-1.25409	conserved hypothetical protein
AFLA_031890	1.59609	kinesin, putative
AFLA_032090	1.0012	conserved hypothetical protein
AFLA_032310	1.4995	conserved hypothetical protein
AFLA_032780	1.42276	serine/threonine protein kinase, putative
AFLA_032930	1.28515	conserved hypothetical protein
AFLA_033410	-2.04153	conserved hypothetical protein
AFLA_033650	-1.67281	GTP-binding nuclear protein Ran, putative
AFLA_034090	1.06869	conserved hypothetical protein
AFLA_034140	-2.04928	monocarboxylate permease, putative
AFLA_034220	1.8669	GPI transamidase component (GAA1), putative
AFLA_034420	1.81763	leucyl-tRNA synthetase
AFLA_034690	-1.33127	conserved hypothetical protein
AFLA_034930	1.6925	hypothetical protein
AFLA_035140	-1.18047	vacuolar fusion protein mon1, putative
AFLA_035860	3.2155	DUF21 and CBS domain protein (Mam3), putative
AFLA_036390	-1.02976	conserved hypothetical protein
AFLA_036700	2.6176	conserved hypothetical protein
AFLA_036940	1.16275	cytochrome P450 monooxygenase, putative
AFLA_036950	1.17957	hypothetical protein
AFLA_037160	2.23706	thiazole biosynthesis enzyme Sti35
AFLA_037560	1.79549	conserved hypothetical protein
AFLA_037930	-2.43053	conserved hypothetical protein
AFLA_038640	-1.51767	fatty acid synthase alpha subunit, putative
AFLA_038830	-1.32938	hypothetical protein
AFLA_039080	1.82416	MGMT family protein
AFLA_039090	1.51974	hypothetical protein
AFLA_039200	1.44827	cytochrome P450, putative
AFLA_040140	-1.42709	aquaporin
AFLA_040370	1.26709	membrane copper amine oxidase, putative
AFLA_041370	1.1264	isoflavone reductase family protein
AFLA_041670	1.69421	hypothetical protein
AFLA_041750	1.44164	DNA repair protein Rhp26/Rad26, putative
AFLA_042040	-2.27323	2-deoxy-D-gluconate 3-dehydrogenase, putative
AFLA_042150	-1.58244	catechol dioxygenase, putative
AFLA_042180	-1.69771	hypothetical protein
AFLA_042880	1.9833	hypothetical protein
AFLA_043030	-1.29152	MFS transporter, putative
AFLA_043300	-1.76621	allantoinase Dal1, putative
AFLA_043470	-1.9738	ankyrin repeat-containing protein, putative
AFLA_043510	-2.77737	protein kinase domain-containing protein
AFLA_043830	1.33585	thiamin biosynthesis protein (Thi-4), putative
AFLA_043950	2.625	serine/threonine protein kinase (YPK1), putative
AFLA_044140	-1.68927	cytosolic regulator Pianissimo, putative
AFLA_044180	-2.64856	AAR2 family protein
AFLA_044350	1.07342	TOR pathway phosphatidylinositol 3-kinase TorA
AFLA_045260	-1.11849	hypothetical protein
AFLA_045370	1.89919	ankyrin, putative
AFLA_045490	1.19147	dimethylallyl tryptophan synthase, putative
AFLA_045840	-1.19642	adenosine deaminase
AFLA_045870	-1.57234	hypothetical protein
AFLA_046190	1.58182	nickel transport protein, putative
AFLA_046370	2.01442	HET-s/LopB domain protein
AFLA_046770	1.28515	C6 transcription factor, putative
AFLA_054540	1.28515	hypothetical protein
AFLA_054550	-1.74089	myo inositol dehydrogenase, putative
AFLA_055180	-1.93689	lysine decarboxylase-like protein
AFLA_055220	-1.39743	Hsp70 nucleotide exchange factor (Fes1), putative
AFLA_055930	-1.4399	hypothetical protein
AFLA_055990	1.26972	multiple myeloma tumor-associated protein, putative
AFLA_056180	1.7643	hypothetical protein
AFLA_056880	2.58483	DNA-directed RNA polymerase III subunit RPC7, putative
AFLA_057080	1.03525	hypothetical protein
AFLA_057510	2.16833	monocarboxylate transporter, putative
AFLA_058530	1.019	MFS multidrug transporter, putative
AFLA_058800	-1.55697	GAF domain nucleotide-binding protein
AFLA_058890	-1.67025	oxidoreductase, putative
AFLA_058970	-1.40633	cytochrome P450, putative
AFLA_058980	1.06304	hypothetical protein
AFLA_059690	2.51775	hypothetical protein
AFLA_059970	1.32467	short-chain dehydrogenase, putative
AFLA_060020	-1.88289	PKS-like enzyme, putative
AFLA_060580	-1.18905	NEDD8 conjugating enzyme (UbcL), putative
AFLA_060620	-2.64856	hypothetical protein
AFLA_060880	2.8159	amino acid permease, putative
AFLA_061060	-1.24985	hypothetical protein
AFLA_061140	-1.95635	cytochrome P450, putative
AFLA_061450	-2.64856	hypothetical protein
AFLA_061480	-1.90179	tetracycline-efflux transporter, putative
AFLA_061950	-2.17428	autophagocytosis protein Aut1, putative
AFLA_062030	-1.08364	carbonic anhydrase, putative
AFLA_062550	-1.16041	phosphatidylserine decarboxylase, putative
AFLA_062560	1.69157	GILT family thiol reductase, putative
AFLA_062750	2.58363	hypothetical protein
AFLA_062860	1.18122	polyketide synthase, putative
AFLA_063140	1.18108	hypothetical protein
AFLA_063220	1.32467	hypothetical protein
AFLA_063290	2.90343	hypothetical protein
AFLA_063300	1.43782	hypothetical protein
AFLA_063400	2.75003	hypothetical protein
AFLA_063410	2.27749	hypothetical protein
AFLA_064300	-1.69127	fructosyl amino acid oxidase, putative
AFLA_064330	-1.4399	hypothetical protein
AFLA_064440	1.86295	transport protein, putative
AFLA_064600	-1.11849	hypothetical protein
AFLA_064800	-1.48083	MFS monosaccharide transporter, putative
AFLA_065150	1.58182	allantoate permease, putative
AFLA_065620	1.02654	MFS multidrug transporter, putative
AFLA_065720	1.10952	aldehyde dehydrogenase, putative
AFLA_065930	-1.22187	pantothenate transporter, putative
AFLA_066110	1.39489	bicyclomycin resistance protein, putative
AFLA_066280	-2.35027	hypothetical protein
AFLA_066410	1.76811	ATP-grasp superfamily protein
AFLA_066840	1.19296	hybrid PKS/NRPS enzyme, putative
AFLA_067550	1.5382	1,4-beta-D-glucan-cellobiohydrolyase, putative
AFLA_067910	1.123	HLH transcription factor, putative
AFLA_068580	1.25042	vesicle-mediated transport protein Vid24, putative
AFLA_068670	-2.16003	purine-cytosine permease, putative
AFLA_068860	-1.11849	hypothetical protein
AFLA_068950	-2.29236	M protein repeat protein
AFLA_068960	1.20615	Vacuolar ATP synthase subunit H, putative
AFLA_068990	-1.95854	hypothetical protein
AFLA_069440	2.88418	pyridoxal reductase (AKR8), putative
AFLA_069700	1.64592	C2H2 transcription factor, putative
AFLA_070630	-1.07985	hypothetical protein
AFLA_071250	1.48639	membrane associated DnaJ chaperone, putative
AFLA_071660	2.82054	xylitol dehydrogenase
AFLA_071790	3.2255	galactose oxidase, putative
AFLA_071910	2.30969	MFS tranporter, putative
AFLA_072780	1.20503	sarcosine oxidase, putative
AFLA_073220	-1.24176	hypothetical protein
AFLA_073240	-1.67281	conserved hypothetical protein
AFLA_073270	-1.06929	conserved hypothetical protein
AFLA_073760	-1.07633	DNA mismatch repair protein Msh3
AFLA_073950	1.019	Rho guanyl nucleotide exchange factor, putative
AFLA_074100	1.06151	gamma-glutamyltranspeptidase
AFLA_074370	1.13683	conserved hypothetical protein
AFLA_074630	1.87481	MFS nicotinic acid transporter Tna1, putative
AFLA_074720	1.62673	conserved hypothetical protein
AFLA_074850	-1.74089	hypothetical protein
AFLA_075330	1.20431	conserved hypothetical protein
AFLA_076530	2.24779	sugar transporter family protein
AFLA_076900	-2.98587	conserved hypothetical protein
AFLA_077590	-1.09985	conserved hypothetical protein
AFLA_078110	-1.11849	C-14 sterol reductase, putative
AFLA_078350	-1.4399	conserved hypothetical protein
AFLA_078400	3.15588	protein phosphatase PP2A regulatory B subunit, putative
AFLA_078430	3.01422	aldehyde dehydrogenase family protein
AFLA_078590	-1.7853	extracellular matrix protein, putative
AFLA_079310	2.37844	3-hydroxyanthranilate 3,4-dioxygenase, putative
AFLA_079510	1.50601	MFS transporter, putative
AFLA_079520	1.06151	conserved hypothetical protein
AFLA_079580	-2.43028	cytochrome b561, putative
AFLA_079600	-1.27092	acyl-CoA:6-aminopenicillanic-acid-acyltransferase, putative
AFLA_079680	1.38718	vesicular fusion ATPase, putative
AFLA_079690	1.70902	conserved hypothetical protein
AFLA_080180	1.33137	hypothetical protein
AFLA_080210	-1.60247	sugar transporter, putative
AFLA_080840	-1.87613	conserved hypothetical protein
AFLA_080980	1.06151	conserved hypothetical protein
AFLA_081270	1.98567	F-box domain protein
AFLA_081370	1.25042	conserved hypothetical protein
AFLA_081990	1.15567	conserved hypothetical protein
AFLA_082360	1.55838	conserved hypothetical protein
AFLA_082430	-1.69127	conserved hypothetical protein
AFLA_082730	-1.74089	conserved hypothetical protein
AFLA_083160	1.3955	molybdopterin cofactor biosynthetic protein
AFLA_083390	1.60711	conserved hypothetical protein
AFLA_083610	1.42741	glutathione S-transferase, putative
AFLA_083690	1.78773	phosphoglycerate mutase family protein
AFLA_083940	1.77383	C6 transcription factor (UaY), putative
AFLA_084010	1.89919	lactam utilization protein LamB
AFLA_084030	1.73543	conserved hypothetical protein
AFLA_084440	1.019	autophagy protein Atg27, putative
AFLA_084450	-2.08242	conserved hypothetical protein
AFLA_084690	1.83739	ADP-ribosylation factor family protein
AFLA_084830	-1.16825	hypothetical protein
AFLA_085200	1.39925	camp independent regulatory protein
AFLA_085760	3.54961	conserved hypothetical protein
AFLA_086620	-1.78181	glucose-6-phosphate 1-dehydrogenase
AFLA_087060	-2.39689	GMC oxidoreductase, putative
AFLA_087320	1.08257	GABA permease GabA
AFLA_087370	2.34367	transcription/RNA-processing factor Ssu72
AFLA_087470	1.65361	plasma membrane low affinity zinc ion transporter, putative
AFLA_087570	1.32467	conserved hypothetical protein
AFLA_087620	-2.22459	NmrA family transcriptional regulator, putative
AFLA_087800	-1.31274	hypothetical protein
AFLA_088090	-1.65832	long-chain fatty acid transporter, putative
AFLA_088190	1.71775	IZH family channel protein (Izh3), putative
AFLA_088560	-1.90782	intermediate filament protein (Mdm1), putative
AFLA_088870	-1.9738	porphobilinogen synthase, putative
AFLA_089220	-1.09982	Ser/Thr protein phosphatase family
AFLA_089240	1.7868	glutamyl-tRNA amidotransferase, A subunit, putative
AFLA_089540	2.99939	hypothetical protein
AFLA_089560	1.019	pyruvate decarboxylase, putative
AFLA_089590	1.65415	hypothetical protein
AFLA_089900	1.06539	cofilin, actophorin, putative
AFLA_090450	-1.96576	proline oxidase Put1, putative
AFLA_090530	-1.9738	hypothetical protein
AFLA_090750	1.23416	AMID-like mitochondrial oxidoreductase, putative
AFLA_091080	-1.1644	serine/threonine protein kinase (Kcc4), putative
AFLA_091610	1.019	short-chain dehydrogenase/reductase family protein, putative
AFLA_091650	-1.76198	GPI anchored protein, putative
AFLA_091670	1.93999	metalloreductase, putative
AFLA_092190	1.26194	hypothetical protein
AFLA_092200	1.65302	hypothetical protein
AFLA_092300	1.98683	hypothetical protein
AFLA_092830	1.37779	Rho guanyl nucleotide exchange factor, putative
AFLA_092860	2.04446	DUF985 domain protein
AFLA_093530	1.18316	oxidoreductase, 2OG-Fe(II) oxygenase family
AFLA_093760	-2.19386	hypothetical protein
AFLA_094080	-1.60406	kinesin family protein
AFLA_094160	1.38801	hypothetical protein
AFLA_094450	1.01375	aspartic endopeptidase Pep1/aspergillopepsin F
AFLA_095560	1.90117	hypothetical protein
AFLA_096010	-1.72299	hypothetical protein
AFLA_096040	-2.7309	hypothetical protein
AFLA_096060	-1.23308	hypothetical protein
AFLA_096380	1.89838	FAD dependent oxidoreductase, putative
AFLA_096490	2.18975	hypothetical protein
AFLA_097240	-1.4399	hypothetical protein
AFLA_097400	2.91431	2-amino-3-carboxymuconate-6-semialdehyde decarboxylase, putative
AFLA_098160	1.28515	short-chain dehydrogenase, putative
AFLA_098260	-1.02394	AP-1 adaptor complex subunit mu, putative
AFLA_098450	-1.12781	DNA damage response protein Rtt109, putative
AFLA_098490	2.5906	hypothetical protein
AFLA_098580	-1.23075	hypothetical protein
AFLA_098700	-1.37903	carbonyl reductase, putative
AFLA_100180	-1.11849	phosphoribosyl-aminoimidazole-succinocarboxamide synthase
AFLA_100290	1.71743	aliphatic nitrilase, putative
AFLA_100400	-1.13697	hypothetical protein
AFLA_100640	3.04544	hypothetical protein
AFLA_100930	1.02957	hypothetical protein
AFLA_101120	1.49012	WD repeat protein
AFLA_101280	-1.59077	MYB DNA-binding domain protein
AFLA_101350	1.88123	hypothetical protein
AFLA_101720	2.14977	cytochrome P450, putative
AFLA_101980	-1.33365	tartrate dehydrogenase, putative
AFLA_102010	1.07269	class V chitinase, putative
AFLA_102260	1.18316	hypothetical protein
AFLA_102290	2.63895	mitochondrial metallochaperone Sco1, putative
AFLA_102310	-1.10086	hypothetical protein
AFLA_102360	2.57106	hypothetical protein
AFLA_102780	1.82416	WD-repeat protein, putative
AFLA_103010	1.73772	dsDNA-binding protein PDCD5, putative
AFLA_103220	1.59609	cytoskeleton assembly control protein Sla2, putative
AFLA_103380	-1.53134	hypothetical protein
AFLA_103490	-1.17787	transcription elongation factor SPT6, putative
AFLA_103840	1.50905	cell cycle protein kinase, putative
AFLA_104190	1.13683	hypothetical protein
AFLA_104490	-1.05201	hypothetical protein
AFLA_106110	2.37199	hypothetical protein
AFLA_106220	1.4068	cytochrome P450, putative
AFLA_106730	1.98683	hypothetical protein
AFLA_107110	2.30996	hypothetical protein
AFLA_107130	-1.09494	D-isomer specific 2-hydroxyacid dehydrogenase family protein
AFLA_107610	1.16122	NmrA-like family protein
AFLA_107850	1.29441	hypothetical protein
AFLA_107960	-2.20313	hypothetical protein
AFLA_108210	1.90117	hypothetical protein
AFLA_108430	-1.21368	hypothetical protein
AFLA_109150	-2.17428	C2H2 finger domain protein (Ezf), putative
AFLA_109230	-1.47739	2-hydroxyacid dehydrogenase, putative
AFLA_110180	-1.06468	hypothetical protein
AFLA_110360	-1.83091	hypothetical protein
AFLA_110380	-1.36091	hypothetical protein
AFLA_110390	1.14166	hypothetical protein
AFLA_110670	1.90117	thioredoxin, putative
AFLA_110800	1.82416	telomere length regulator protein (Rif1), putative
AFLA_110820	1.06151	choline transport protein, putative
AFLA_111040	-1.33127	phytase
AFLA_111100	-1.45836	mitochondrial peroxiredoxin Prx1, putative
AFLA_111310	-2.17428	monosaccharide-P-dolichol utilization protein, putative
AFLA_112150	1.94623	phosphoribosylaminoimidazolecarboxamide formyltransferase/IMP
AFLA_112230	-2.25475	zinc metalloprotease, putative
AFLA_112380	-1.45836	integral membrane protein
AFLA_112480	1.16122	3-oxo-5-alpha-steroid 4-dehydrogenase family protein
AFLA_112840	-1.91623	polyketide synthase, putative
AFLA_113020	-1.68421	methionine aminopeptidase, type II, putative
AFLA_113340	-1.55256	hypothetical protein
AFLA_113640	1.28515	hypothetical protein
AFLA_113710	1.49012	mating-type switch/DNA repair protein Swi10/Rad10, putative
AFLA_113730	-2.50711	progesterone binding protein, putative
AFLA_113890	2.65977	nuclear pore complex subunit (SEC13), putative
AFLA_114030	1.019	JmjC domain protein, putative
AFLA_114930	1.72121	hypothetical protein
AFLA_115010	-1.54146	TFIIH and nucleotide excision repair factor 3 complexes subunit
AFLA_115190	-1.87329	C4-dicarboxylate transporter/malic acid transport protein, putative
AFLA_115350	-1.11849	calcium permease family membrane transporter
AFLA_115940	1.55838	sin3b, putative
AFLA_116200	1.45234	hypothetical protein
AFLA_116610	1.30153	hypothetical protein
AFLA_116830	1.0465	hypothetical protein
AFLA_116860	1.69157	alpha-N-acetylglucosaminidase, putative
AFLA_116920	-1.11154	short-chain dehydrogenase, putative
AFLA_117500	-1.46107	hypothetical protein
AFLA_117630	-3.11906	hypothetical protein
AFLA_117900	1.27295	thermolabile L-asparaginase, putative
AFLA_118620	1.82875	oxidoreductase CipA-like, putative
AFLA_118970	1.3772	MAK1-like monooxygenase, putative
AFLA_119560	1.95651	pyridoxamine phosphate oxidase, putative
AFLA_120020	1.019	choline transport protein, putative
AFLA_120180	1.07062	pheromone processing carboxypeptidase (Sxa2), putative
AFLA_120300	1.66623	kinesin light chain, putative
AFLA_120920	1.3218	hypothetical protein
AFLA_120980	2.92809	zinc finger protein, putative
AFLA_121000	-2.64415	hypothetical protein
AFLA_121110	-1.40185	hypothetical protein
AFLA_122330	-1.463	allantoate permease, putative
AFLA_130720	-1.91298	SacI domain and endonuclease/exonuclease/phosphatase family protein
AFLA_131740	-1.40137	aromatic ring-opening dioxygenase LigB subunit, putative
AFLA_131910	-1.11849	hypothetical protein
AFLA_132180	1.40621	aldehyde dehydrogenase ALDH
AFLA_132360	-1.42849	glial factor naturation factor, putative
AFLA_132890	1.56473	actin cytoskeleton organization protein (Cro1), putative
AFLA_133830	-1.39092	alcohol dehydrogenase, putative
AFLA_133920	1.94353	Acyl CoA binding protein family
AFLA_134270	-1.11849	efflux pump antibiotic resistance protein, putative
AFLA_134340	-1.45822	BAR domain protein
AFLA_134370	-3.31756	acetylglutamate synthase
AFLA_134460	1.3625	hypothetical protein
AFLA_134530	2.22568	Rad4 family protein
AFLA_134600	1.96535	hypothetical protein
AFLA_134760	2.78341	hypothetical protein
AFLA_135520	-1.29039	hypothetical protein
AFLA_135550	1.16199	protein kinase regulator (Mob1), putative
AFLA_135600	1.32077	hypothetical protein
AFLA_136050	-2.0221	hypothetical protein
AFLA_136090	-2.19386	MFS transporter, putative
AFLA_136300	1.39489	hypothetical protein
AFLA_136340	-1.35129	aminotransferase family protein (LolT), putative
AFLA_136690	2.16872	hypothetical protein
AFLA_136990	1.14349	calcium/calmodulin-dependent protein kinase, putative
AFLA_137070	-1.83091	allantoate permease, putative
AFLA_137730	1.37162	hypothetical protein
AFLA_137770	-1.92246	UMTA methyltransferase family protein
AFLA_137850	2.29477	hypothetical protein
AFLA_138550	2.35469	O-methyltransferase, putative
AFLA_138570	-1.81864	protease S8 tripeptidyl peptidase I, putative
AFLA_138580	1.14801	integral membrane protein Pth11-like, putative
AFLA_138790	1.39836	hypothetical protein
AFLA_138860	-3.12611	hypothetical protein
AFLA_138930	1.20431	C6 transcription factor, putative
AFLA_139250	-2.89562	aflL/ verB/ desaturase/ P450 monooxygenase
